# Habitat specificity is not universal proxy for sensitivity to habitat conversion among rodents on the Canadian Prairies

LEANNE M. HEISLER<sup>1</sup>, GAVIN L. SIMPSON<sup>2,1</sup>, RAY G. POULIN<sup>3</sup>, TROY I. WELLCOME<sup>4,5</sup>, AND BRITT  
D. HALL<sup>1</sup>

<sup>1</sup>*Department of Biology, University of Regina, Regina, Saskatchewan, S4S 0A2, Canada*

<sup>2</sup>*Institute of Environmental Change and Society, Regina Saskatchewan S4S 0A2 Canada*

<sup>3</sup>*Royal Saskatchewan Museum, Regina, Saskatchewan S4P 2V7 Canada*

<sup>4</sup>*Department of Biological Sciences, University of Alberta, Edmonton, Alberta T6B 2X3 Canada*

<sup>5</sup>*Canadian Wildlife Service, Environment Canada, Edmonton, Alberta T6B 2X3, Canada (TIW)*

*Abstract.* Converting habitat for agricultural production threatens biodiversity loss worldwide and has significant implications for human well-being. Debates on how to conserve biodiversity as the demand for agriculture products rises is being informed by studies using habitat specificity as a proxy for sensitivity to land modification, assuming all species respond to habitat loss and fragmentation relative to their affinity towards the habitat type being converted. Here, we test this assumption among rodent assemblages on the Canadian Prairies, hypothesizing negative responses among grassland obligates and neutral or positive responses among habitat generalists to landscape change along a gradient of increasing agricultural intensity. We found complex, sometimes contradictory responses among rodent species, which depended on the magnitude of habitat loss that had occurred and did not always reflect each species' relative affinity for grassland habitat. Our results suggest future studies should avoid assuming a single habitat type appropriately characterizes resource limitation among all species, and instead carefully consider which dimension of the ecological niche defines specificity for each species. Our results indicate

23 habitat specificity is not always a reliable proxy for sensitivity to land modification, with  
24 significant implications for biodiversity conservation when used to inform agriculture and land  
25 use policies.

26 *Keywords: agriculture; fragmentation; grassland; habitat specificity; habitat loss; land*  
27 *modification; land sharing; land sparing; landscape; rodent*

28 \* Correspondent: [leanneheisler@gmail.com](mailto:leanneheisler@gmail.com)

## 29 INTRODUCTION

30 Agriculture is the leading cause of biodiversity loss worldwide, requiring the conversion  
31 of habitat into new land-use types for crop and livestock forage production, which reduces  
32 vegetation structure and simplifies composition (Benton et al. 2003; Connor et al. 2000; Tews et  
33 al. 2004; Fahrig et al. 2011). Loss of a single habitat patch results in species loss inside and  
34 outside the patch itself, reverberating as widespread biodiversity loss throughout the surrounding  
35 landscape (Burns & Gear 2008; Wilson et al. 2016). Over 75% of Earth's terrestrial land mass  
36 shows evidence of land modification (Ellis and Ramunkutty 2008), of which 39-50% is due to  
37 modern agricultural and urban-industrial uses (Vitousek et al. 1997; Chapin et al. 2000; Foley et  
38 al. 2005). Globally, current rates of species extinction are 100-1000x higher than expected from  
39 the fossil record, indicating Earth's 6<sup>th</sup> mass extinction is underway (Tilman et al. 1994; Pimm et  
40 al. 1995; Barnosky et al. 2011; Dirzo et al. 2014). A crisis has also been identified in which  
41 ecological function is threatened in many biomes because of limited ecological protection  
42 (Hoekstra et al. 2005). As the global human population and food demand increases, further land  
43 modification will be needed, intensifying biodiversity loss and failing biome functions (Tilman  
44 et al. 2001; Foley et al. 2005; Green et al. 2005; Diaz et al. 2006; Tilman et al. 2011; Cardinale et  
45 al. 2012; Baudron and Giller 2013; Haddad et al. 2015).

46  
47           Fragmentation effects on biodiversity are more complex, differentially influencing  
48 species' habitat use, dispersal capabilities, and population persistence (Henle et al. 2004; Wilson  
49 et al. 2016). Fragmentation is a process by which remaining habitat patches become smaller and  
50 more isolated as land modification proceeds, changing the composition and spatial configuration  
51 of habitats at the landscape level (Fahrig 2003; Ewers and Didham 2005). Observed population  
52 responses to fragmentation are often inconsistent within and among taxonomic groups (Bender et  
53 al. 1998; Debinski and Holt 2000; Ewers and Didham 2005; Tylianakis et al. 2008; Fahrig 2017;  
54 Keinath et al. 2017). A recent meta-analysis found almost 75% of significant fragmentation  
55 effects indicate positive correlations with species abundances, further identifying the variable  
56 influence of habitat fragmentation (Fahrig 2017). Fragmentation is also highly correlated with  
57 habitat loss (Fahrig 2003); species may not respond until enough habitat loss occurs to make the  
58 change in landscape configuration relevant to the same species (Andren et al. 1994; Hanski and  
59 Ovaskeinan 2002; Betts et al. 2007). Population responses to one fragmentation metric may also  
60 be confounded with habitat loss or other fragmentation metrics. For example, area and edge  
61 effects can be both synergistic (Ewers and Didham 2007) and independent (Banks-Leite et al.  
62 2010) but are often confounded because of their high collinearity (Fletcher et al. 2005) and scale  
63 dependency (Comfort et al. 2016). Population responses among species are also interdependent  
64 and indirect (e.g., competitive interactions, multi-trophic relationships, pathogen infection  
65 intensities, mutualisms between plants and animals; Tylianakis et al. 2008; Didham et al. 2012;  
66 Wilson et al. 2016). Despite all of this, recent assessments of fragmentation effects on biome-  
67 wide ecosystem function indicate the immediate need to better understand and act to reduce these  
68 effects where they negatively affect biodiversity (Haddad et al. 2015).

69 Land modification may homogenize plant and animal communities by favouring habitat  
70 generalists at the expense of habitat obligates. Habitat specificity is an evolutionary strategy for  
71 resource acquisition within heterogeneous landscapes. Species adapt to either acquire resources  
72 within one or a few habitat types and maintain resource availability through competition (i.e.,  
73 habitat obligate), or use a diverse resource base across multiple habitat types and maintain access  
74 through colonization (i.e., habitat generalist; Futuyma and Moreno 1988; McKinney and  
75 Lockwood 1999; Marvier et al. 2004; DeVictor et al. 2008; DeVictor 2010; Clavel et al. 2011).  
76 Communities maintaining populations of both obligates and generalists are resilient to  
77 environmental change because species loss from some functional groups are counterbalanced by  
78 gains in other groups (McNaughton 1977; Chapin et al. 2000; Diaz et al. 2006). This also  
79 maintains ecosystem function by maintaining redundancy among groups experiencing loss  
80 during periods of environmental change (Chapin et al. 2000; Virginia and Wall 2001; Hector and  
81 Bagchi 2007). However, land modification permanently and rapidly homogenizes habitat  
82 mosaics into highly productive crop monocultures that experience consistent, intra-annual  
83 disturbances (Benton et al. 2003). Habitat generalists may be more capable of taking advantage  
84 of this high productivity because of their ability to colonize consistently disturbed habitats  
85 (Tilman et al. 1994; Wright et al. 2012). In contrast, habitat obligates are less flexible in the  
86 resource base they can use, and so are more vulnerable to disturbances that eliminate habitat  
87 (Tilman et al. 1994; DeVictor et al. 2008; Reino et al. 2014). The resulting generalist-dominated  
88 communities may synchronize assemblage responses to environmental change, with implications  
89 for ecosystem resilience (McKinney and Lockwood 1999; Chapin et al. 2000; Diaz et al. 2006;  
90 Clavel et al. 2011; Cardinale et al. 2012).

91           Here, we use rodent species responses to land modification to examine whether habitat  
92   specificity predicts sensitivity of rodent assemblages to habitat loss and fragmentation on the  
93   Canadian Prairies. Little is known regarding how rodent assemblages respond to the  
94   fragmentation of remaining habitat in agroecosystems, with implications for the ecosystem  
95   processes they maintain, including predator population regulation (Korpimäki et al. 2004; White  
96   et al. 2013), disease and parasite prevalence (Ostfeld and Holt 2004), plant diversity through  
97   foraging habits (Sieg 1987), soil conditions, nutrient flow, and habitat availability through  
98   burrowing activities (Grant and French 1980). Population abundance or density is typically  
99   estimated using conventional trapping, which has logistic constraints that limit studies to patch  
100   area and isolation effects (Hanser et al. 2011). Fewer studies have identified rodent species  
101   responses to fragmentation at the landscape level at which fragmentation affects population  
102   persistence (e.g., Pena et al. 2003; Heisler et al. 2013; Massa et al. 2013; Torre et al. 2015). The  
103   Canadian Prairies experienced spatially inconsistent land modification post-European settlement  
104   (Samson and Knopf 1994; Samson et al. 2004), resulting in landscapes that differ in the  
105   magnitude of grassland loss and fragmentation that occurred there (Gage et al. 2016), providing  
106   ideal conditions for this study.

107           We hypothesize that rodent species respond differently to fragmentation depending on  
108   the degree of habitat specificity each species exhibits towards grassland habitat. We predict  
109   grassland and vegetation obligates will respond negatively to increased loss and isolation of  
110   remaining grassland patches, while habitat generalists will either 1) show no response because  
111   individuals perceive no difference among habitat and land modified for agricultural use, or 2)  
112   exhibit positive responses to the introduction of highly productive, new land-use types and edge  
113   habitat providing access to additional resources.

114 METHODS

115 *Study area*

116 Samples were collected across almost 2 million km<sup>2</sup> of the mixed-grass prairie and aspen  
117 parkland of the Northern Great Plains in Canada (Fig. 1). Vegetation of the mixed-grass prairie  
118 consists mostly of grasses (e.g., *Agropyron* spp., *Bouteloua* spp., *Stipa* spp.), upland sedges (e.g.,  
119 *Carex* spp.), forbs, club moss (e.g., *Selaginella densa*) and intermittent patches of small shrubs  
120 (e.g., *Symphoricarpus* spp., *Elaiagnus* spp., *Prunus* spp., *Amelanchier* spp.) and trees (e.g.,  
121 *Populus* spp., *Salix* spp.) where moisture permits (Coupland 1961). The aspen parkland  
122 represents the transition zone between the southern mixed-grass prairie and northern boreal  
123 forest and is characterized by aspen bluffs (e.g., *Populus* spp.) and fescue prairie (e.g., *Stipa*  
124 *festuca*; Coupland 1961; Barker and Whitman 1988). Vegetation composition in the study area is  
125 heavily influenced by local topography, boulder clay soil deposits of varying texture, and a  
126 continental climate of extreme variation in temperature and precipitation with a short growing  
127 period of 3-5 months (Coupland 1950).

128 Both ecoregions are heavily altered by land modification, through which heterogeneous  
129 grasslands were converted into a few agricultural land use types, thus decreasing vegetative  
130 species composition and structure and increasing bare ground (Smoliak 1988). Only 6% and 27%  
131 of the aspen parkland and mixed-grass prairie remain intact, respectively (Roch and Jaeger  
132 2014). Most modification occurred between the 1880's and 1940's (Smoliak 1988; Samson et al.  
133 2004) but it continues today at lower rates. An average annual 2% loss has occurred since 2009  
134 in some regions of the Canadian Prairies, resulting in an additional 13% loss of remaining  
135 grasslands (Gage et al. 2016). Land modification was not evenly distributed across the study  
136 area. Large tracts of grassland remain intact in southeast Alberta and southwest Saskatchewan,

137 while over 90% of the grasslands in other regions are heavily modified (Roch and Jaeger 2014;  
138 Fig. 1). This variation in agricultural intensification provides an opportunity to examine  
139 landscape-level rodent species responses to grassland loss and fragmentation, with comparisons  
140 of responses among grassland obligates and habitat generalists.

#### 141 *Rodent abundance estimates*

142 Rodent species abundances were estimated from great horned owl (*Bubo virginianus*) and  
143 burrowing owl (*Athene cunicularia*) pellets collected across the study area (Heisler et al. 2016).  
144 Over the last 20 years, owl nests and associated roosts were visited once to several times during  
145 the breeding season and all accessible pellets were collected. Great horned owl pellets were  
146 collected from 207 locations by Alberta's Environment & Sustainable Resource Development  
147 Fish & Wildlife division in 2000 and 2001, and from an additional 436 locations by research  
148 scientists and bird enthusiasts from 2008 until 2016. Burrowing owl pellets were collected from  
149 1,179 locations by the Royal Saskatchewan Museum and the Canadian Wildlife Service from  
150 1997 until 2016.

151 All pellets were processed to clean the bones and teeth in one of two ways: (1) soaked in  
152 10% sodium hydroxide solution for 2 – 3 hours to dissolve the fur from the pellets; or (2) soaked  
153 in water and manually separated. Prey species were then identified by the diagnostic  
154 characteristics of craniomandibular elements (i.e., teeth, mandibles, skulls), using a reference  
155 collection provided by the Royal Saskatchewan Museum and Royal Alberta Museum. Species  
156 abundances were quantified for each collection based on the maximum number of right or left  
157 mandibles, or the total number of skulls present (i.e., minimum number of individuals). The  
158 resulting dataset includes 84,196 individuals of 11 grassland rodent species.

159 Owl pellets accumulated over differing amounts of time at each pellet collection location,  
160 requiring standardizing to account for differential sampling effort. Great horned owl pellet  
161 collection locations were visited once and likely represent owl foraging efforts for that year. In  
162 contrast, burrowing owl pellet collection locations were visited once to several times during the  
163 breeding season, and some locations were visited over multiple years. To account for these  
164 differences, rodent abundances were summed when more than 1 visit was made each year to the  
165 same pellet collection location. Each pellet sample therefore represents all pellets collected from  
166 a single location within a single year, hereafter referred to as a sample. To accurately reflect  
167 rodent community composition and be included in subsequent statistical analyses, each pellet  
168 sample also met a threshold of the minimum number of individuals identified necessary to reach  
169 the average prey species richness represented in pellet collections for both owl species (great  
170 horned owl,  $\bar{X} = 4$  species; burrowing owl,  $\bar{X} = 3$  species). We therefore used great horned owl  
171 pellet samples with 30 or more individuals, and burrowing owl pellet samples with 10 or more  
172 individuals, respectively. A total 323 great horned owl and 1,061 burrowing owl samples were  
173 used in subsequent statistical analyses (Table 1).

174 Each rodent species was categorized as a grassland obligate or a habitat generalist  
175 according to its habitat description in Eder and Kennedy (2011; Table 1). Grassland habitats are  
176 dominated by herbaceous and shrub vegetation maintained by fire, grazing, drought, and freezing  
177 temperatures (Axelrod 1985; White et al. 2000). Vegetation composition and structure is largely  
178 determined locally by topography, precipitation, and soil texture (Epstein et al. 1997; Lane et al.  
179 1998; Hooke and Burke 2000). Here, we use species natural history accounts from Eder and  
180 Kennedy (2011) to characterize grassland obligates as those species selecting for habitat  
181 vegetated with a combination of native grasses, forbs, and short woody plants, and habitat



182 generalists as those species that occupy a variety of habitat types and are not limited by  
183 vegetation cover (McKinney and Lockwood 1999; Marvier et al. 2004; DeVictor et al. 2008;  
184 DeVictor et al. 2010; Clavel et al. 2011).

185 *Metrics of habitat loss, fragmentation, habitat composition, soil texture, and climate*

186 We used several metrics to characterize habitat composition, grassland loss and  
187 fragmentation, and abiotic conditions surrounding pellet collection locations. Habitat  
188 composition (i.e., relative proportions of habitat types within landscapes), percent habitat loss,  
189 and several metrics of grassland fragmentation were quantified across the Canadian Prairies from  
190 raster thematic data generated from Landsat5-TM and Landsat 7-ETM+ multi-spectral imagery  
191 of 30 m resolution, representative of circa-2000 conditions (Agriculture & Agri-Food Canada  
192 2012), which was reclassified to 6 broad land use (i.e., crop, tame forage, urban) and habitat  
193 categories (i.e., grass, woody, riparian).

194 Habitat composition was estimated using the proportion of each habitat type (i.e.,  
195 grassland (GRASS), forest and shrub (WOOD), riparian (RIPARIAN)) and agricultural land-use  
196 type (i.e., cropland (CROP), tame forage (TAME), urban (URBAN)) within the foraging range  
197 surrounding each owl pellet collection location (Table 2). The influence of habitat loss was  
198 estimated using the cumulative percentage of the landscape comprised of crop, tame forage, and  
199 urban developments (LOSS; Table 2). Habitat fragmentation was characterized using measures  
200 of grassland edge density (m/ha; ED), average grassland patch perimeter-area ratio (i.e., shape  
201 complexity; PARA), average grassland patch size (ha; AREA), grassland patch density (number  
202 of patches per 100 ha; PD), and grassland patch cohesion (i.e., monotonic index of patch  
203 connectivity; COH; Table 2).

204 We used other abiotic variables known to influence small mammal assemblage  
205 composition across the study area to produce more complete statistical representations of  
206 landscape-level habitat associations for each rodent species. We compiled soil texture variables  
207 from existing soil survey maps by Agriculture and Agri-Food Canada (Soil Landscapes of  
208 Canada Working Group 2010; Heisler et al. 2013). Soil texture was characterized from existing  
209 digitized soil survey maps using the mean proportion of sand (SAND) in the soils of each owl  
210 foraging range surrounding owl pellet collection locations (Centre for Land and Biological  
211 Resources Research 1996; Table 2).

212 We generated three climate variables from monthly precipitation and temperatures  
213 averaged over a 30-year period (i.e., 1971-2000; Agriculture and Agri-Food Canada 2013;  
214 Heisler et al. 2013; Heisler et al. 2014). Growing degree days were generated as the cumulative  
215 temperature above 5 °C from May to September averaged from 1971 to 2000 (GDD5), while the  
216 total annual precipitation from May to September and from October to April averaged from 1971  
217 to 2000 characterized summer rainfall (RAIN) and winter snowfall (SNOW), respectively (Table  
218 2). Lastly, we included habitat composition as the proportions of each land-use and habitat type  
219 (Heisler et al. 2013).

220 Metrics were calculated within radii varying in distance (i.e., 1 - 4 km at 0.5 km intervals)  
221 from pellet collection locations to estimate the appropriate scale of effect reflecting the foraging  
222 distances of burrowing owls and great horned owls from nests and associated roosts (Heisler et  
223 al. 2013). We used generalized additive models (GAMs) with a negative binomial distribution  
224 including the most abundant species (i.e., deer mouse) as the response and all fragmentation  
225 metrics as splines for each radius (see below for model structure). We chose a scale of effect  
226 with the least amount of information loss, or low Akaike Information Criterion (AIC), in both the

227 burrowing owl and great horned owl GAMs so that all further statistical analysis could be done  
228 in a single GAM for each rodent species. Each metric was therefore estimated within a 2.5-km  
229 radius of each owl pellet collection location (Burnham and Anderson 2002).

230 All reclassifying, data preparation, and metric calculation was done using R version 3.5.3  
231 (R Development Core Team 2019). The package raster (Hijmans 2019) was used to read and  
232 mosaic tiles, reclassify land cover, and prepare soil and climate data. Packages rgdal (Bivand et  
233 al. 2019) and raster were used to read and prepare owl pellet, soil, and climate data. Package  
234 landscapemetrics (Hesselbarth et al. 2019) was used to calculate landscape metrics.

### 235 *Statistical analyses*

236 Non-linear responses of rodent species to fragmentation were identified using generalized  
237 additive models (GAMs). Land modification for agricultural use is a highly correlated, spatially  
238 explicit, sometimes non-linear process (Fahrig 2002) that may be reflected in rodent species  
239 responses to fragmentation. GAMs examine both linear and non-linear relationships using  
240 generalized regression of multiple predictors (Hasti and Tibshirani 1990; Wood 2006; Zuur et al.  
241 2009; Zuur 2012). We fit GAMs for each species starting with a Poisson distribution and log link  
242 to account for positive integers:

$$\begin{aligned} 243 \quad R_i \sim \text{Poisson}(\mu_i), \text{ where } \log(\mu_i) = & \alpha + f_1(\text{LOSS}_i) + f_2(\text{ED}_i) + f_3(\log \text{AREA}_i) + \\ 244 \quad & f_4(\text{PARA}_i) + f_5(\text{PD}_i) + f_6(\text{COH}_i) + f_7(\text{ED}_i, \text{LOSS}_i) + f_8(\text{AREA}_i, \text{LOSS}_i) + \\ 245 \quad & f_9(\text{PARA}_i, \text{LOSS}_i) + f_{10}(\text{PD}_i, \text{LOSS}_i) + f_{11}(\text{COH}_i, \text{LOSS}_i) + f_{12}(\text{WET}_i) + \\ 246 \quad & f_{13}(\text{WOOD}_i) + f_{14}(\text{SAND}_i) + f_{15}(\text{GDD5}_i) + f_{16}(\text{RAIN}_i) + f_{17}(\text{SNOW}_i) + \\ 247 \quad & f_{18}(\text{YEAR}_i) + \log(\text{IDED}_i) \end{aligned}$$

248 where  $R_i$  is rodent abundance in the  $i^{\text{th}}$  observation (pellet sample). The terms  $f_1 - f_{18}$  are smooth  
249 functions of habitat loss (LOSS), grassland edge density (ED), average grassland patch size  
250 (AREA), average grassland patch shape complexity (PARA), grassland patch density (PD),  
251

252 grassland patch cohesion (COH), percent riparian (WET), percent woodland (WOOD), percent  
253 sand in soils (SAND), average annual growing degree days  $>5$  °C (GDD5), average summer  
254 rainfall (RAIN), average winter snowfall (SNOW), and the year samples were collected  
255 (YEAR). The natural log-transformed sample size (IDED) was also included as an offset  
256 variable. The restricted maximum likelihood (REML) was used to avoid overfitting while  
257 estimating smoothing parameters. Parameters were penalized to zero and removed from the  
258 model during smoothing parameter estimation when they had little to no effect on rodent  
259 abundance. Overdispersion was accounted for by changing distributions to a negative binomial  
260 distribution when necessary (Zuur et al. 2009; Zuur 2012). Species abundance was included as  
261 the response. Species absences were included only when they were located within the species'  
262 geographic range. To account for high concurrency between LOSS and fragmentation metrics (i.e.,  
263 ED, AREA, PARA, PD, and COH), each fragmentation metric was included as a tensor product  
264 (i.e., synergistic effect) and tensor product interaction with LOSS (i.e., independent effect; Wood  
265 2006). Habitat composition, and soil and annual climate conditions were included to improve  
266 model fit (Heisler et al. 2013; Heisler et al. 2014). Year was included to account for variable  
267 environmental conditions among years samples were collected. Total rodent individuals per  
268 sample was included as a log-transformed offset to account for differing sampling effort.  
269 Concurrency among all predictors was then assessed, those showing high concurrency with LOSS or  
270 fragmentation metrics were removed from the model (Ramsay et al. 2003).

271 Null models for each species included smooth functions of soil texture, annual climate  
272 conditions, habitat composition, year, and the offset term. Comparisons of the fitted and null  
273 models using AIC tested for statistical influence of habitat loss and fragmentation (Burnham and  
274 Anderson 2002). Only models  $>10$  delta AIC units (i.e., competing models) from the null model

275 were considered. The variance explained by fragmentation of each fitted model was estimated by  
276 subtracting the deviance explained of the null model from that of the fitted model. Inferences  
277 were made only from statistically significant predictors using  $p < 0.001$  to account for variability  
278 in estimated  $p$  values (Zuur et al. 2009; Zuur 2012).

279 All statistical analyses were done using R version 3.6.3 (R Development Core Team).  
280 GAMs were estimated using the `mgcv` (Wood et al. 2016) and `gamlss` (Rigby and Stasinopoulos  
281 2005) packages.

## 282 RESULTS

283 Six of the eleven rodent species considered here responded to metrics of habitat loss and  
284 fragmentation on the Canadian Prairies. Fitted models for four grassland obligates (i.e., meadow  
285 vole, prairie vole, Ord's kangaroo rat, and Richardson's ground squirrel) and one habitat  
286 generalist (i.e., long-tailed vole) were competitive with their corresponding null models,  
287 suggesting these models did no better at explaining variance in abundance than random chance  
288 (Table 3). Null models were not competitive for the remaining six species (Table 3), of which  
289 three were grassland obligates (i.e., sagebrush voles, olive-backed pocket mice, and thirteen-  
290 lined ground squirrels) and three habitat generalists (i.e., deer mice, northern grasshopper mice,  
291 and northern pocket gophers). Three species responded to the main effect of habitat loss (i.e.,  
292 deer mice, olive-backed pocket mice, and northern pocket gophers; Table 4). All six species  
293 responded to at least one metric of fragmentation. Fitted models explained 35-82% of variance in  
294 abundance for each rodent species, of which fragmentation effects accounted for <11% for all  
295 species (Table 3).

296 All three species that responded to habitat loss (LOSS), estimated here as the summed  
297 proportions of annual cropland, perennial livestock forage, and urban development, did so up to

298 a threshold of ~40% LOSS, above which the trajectory of their response changed. Olive-backed  
299 pocket mice, considered an arid-adapted grassland obligate, responded negatively to increasing  
300 habitat loss to up to 70% LOSS, above which their response reversed to positive (Fig. 2a). The  
301 other two grassland obligates (i.e., sagebrush voles and thirteen-lined ground squirrels) showed  
302 no response to habitat loss. Predictably for a habitat generalist, deer mice responded positively to  
303 <50% LOSS and >90% LOSS but reversed its response to negative where 50-90% LOSS  
304 occurred (Fig. 2b). Northern pocket gophers, another habitat generalist, responded positively to  
305 <10% LOSS, negatively between 10-80% LOSS, and positively to >90% LOSS (Fig. 2c).

306 Half of the rodent species considered here responded consistently with predictions based  
307 on their specificity for grassland habitat. Thirteen-lined ground squirrels were the only obligate  
308 species to respond predictably to grassland fragmentation, increasing linearly with increasing  
309 cohesion, or connectivity among patches (Fig. 3a). Thirteen-lined ground squirrels also  
310 responded predictably to grassland edge density, declining in abundance to up to 50 m/ha (Fig.  
311 3b). In contrast, two habitat generalists responded as predicted to at least one metric of grassland  
312 fragmentation. Northern grasshopper mice responded positively to decreasing average grassland  
313 patch size, showing elevated abundances where patches were <1 ha in landscapes with <40% or  
314 >90% LOSS (Fig. 4a). And northern pocket gophers responded positively to landscapes with 2-4  
315 grassland patches/100 ha in landscapes with 20-60% LOSS (Fig. 4b).

316 Responses to fragmentation that were inconsistent with our predictions were also  
317 observed among grassland obligates. Sagebrush voles declined in abundance with increasing  
318 grassland patch cohesion (Fig. 5a), and in 30-80% LOSS shifted from a positive response where  
319 average grassland patch size was <2 ha to a negative response where patches were >5 ha in size  
320 (Fig. 6a). Thirteen-lined ground squirrels responded positively to landscapes containing >5

321 patches/100 ha and 20-80% LOSS (Fig. 6b). Olive-backed pocket mice responded positively to  
322 landscapes with grassland edge densities  $>50$  m/ha and 30-80% LOSS (Fig. 6c). Responses from  
323 habitat generalists were also inconsistent with our predictions. Deer mice responded positively to  
324 grassland patch cohesion (Fig. 5b), negatively to  $>50$  m/ha of grassland edge (Fig. 5c), and  
325 negatively to simple grassland patch shapes (i.e.,  $<0.06$  PARA; Fig. 5d). Northern grasshopper  
326 mice responded negatively to increasing grassland patch density (Fig. 5e). Northern pocket  
327 gophers responded negatively to landscapes containing  $>4$  patches/100 ha and 20-80% LOSS  
328 (Fig. 6d).

329 Responses were also observed where fragmentation metrics characterized habitat  
330 heterogeneity instead of fragmentation per se. These responses were observed among species  
331 that responded to fragmentation effects independent of habitat loss where little to no habitat loss  
332 had occurred (i.e.,  $<20\%$  LOSS). In these landscapes, sagebrush voles responded positively to  
333 grassland patches that were  $>4$  ha in size (Fig. 7a). Olive-backed pocket mice responded  
334 negatively to increasing grassland patch density (Fig. 7b). Thirteen-lined ground squirrels  
335 showed decreased abundance with increasing grassland patch density (Fig. 7c). Deer mice  
336 responded positively to landscapes containing 4-12 grassland patches/100 ha (Fig. 7d).

## 337 DISCUSSION

338 We found rodent populations showed stronger responses to changes in habitat  
339 composition than habitat configuration on the Canadian Prairies. Our results found the combined  
340 effects of habitat loss and fragmentation explained an average 9x less variation in rodent  
341 abundances relative to habitat composition, soil texture, and climate variation within the  
342 landscape. Additionally, only three species responded to habitat loss (i.e., olive-backed pocket  
343 mice, deer mice, and northern pocket gophers) while all species responded to at least one metric

344 of habitat fragmentation. The only two studies comparable to this one found lower rodent  
345 diversity in fragmented landscapes (Massa et al. 2013) and shifts in assemblage composition  
346 with increasing habitat fragmentation (Pena et al. 2003). Studies not including fragmentation  
347 effects per se also found strong associations between rodent dynamics and habitat composition at  
348 the landscape-level (e.g., Heisler et al. 2013; Rodriguez and Peris 2007; Torre et al. 2015).  
349 However, too few fragmentation studies on rodent assemblages have been conducted at the  
350 landscape level to draw definitive conclusions. But on the Canadian Prairies, habitat loss and the  
351 corresponding change in habitat configuration appear to play minor roles in delineating rodent  
352 population responses to landscape-level habitat modification for agriculture.

353         This is the first study to distinguish fragmentation effects from those of habitat loss on  
354 rodent assemblages at a landscape level. We found habitat specificity does predict population  
355 responses to habitat loss and fragmentation among grassland obligates and generalists alike,  
356 providing further evidence that modifying natural habitats for agricultural production has  
357 potential to threaten these obligate species with regional extirpation as landscapes are simplified  
358 in habitat composition, shifting rodent assemblages towards generalist-dominated communities  
359 (Heisler et al. 2013). In fact, we also found half of the species considered here (i.e., olive-backed  
360 pocket mice, deer mice, and northern pocket gophers) reversed the trajectory of their responses  
361 to land modification in landscapes where ~50% of the natural habitat was converted, suggesting  
362 a threshold above which land modification begins homogenizing habitat heterogeneity with  
363 similar consequences for biodiversity. This threat persists on the Canadian Prairies as remaining  
364 habitat is converted to up to an average 3.5% per year (Gage et al. 2016). Reduced rodent  
365 diversity in heavily modified landscapes has implications for the ecosystem functions they  
366 facilitate among higher trophic levels. For example, meadow vole irruptions in this study area are



367 now dampened and less consistent (Poulin et al. 2001; Heisler et al. 2014), with potential to  
368 influence the persistence of some prairie predators, including the endangered burrowing owl  
369 (Todd et al. 2001) and the short-eared owl, a species of special concern (Colvin and Spaulding  
370 1983). Habitat generalists such as deer mice and northern grasshopper mice appear to benefit  
371 from land modification, potentially increasing the prevalence of zoonotic diseases in populated  
372 rural areas (Mills and Childs 1998; Ostfeld and Holt 2004; Mills 2005; Hjelle and Torres 2010;  
373 Jonsson et al. 2010). Further research on how landscape-level population responses inform the  
374 spatial distributions of these rodent species and affect their functional roles in highly modified  
375 landscapes is needed in this study area and elsewhere.

376         Several species responded to fragmentation metrics characterizing habitat heterogeneity  
377 in landscapes where grasslands remain intact (i.e., 0-20% LOSS). In these landscapes,  
378 fragmentation metrics estimate heterogeneity in grassland patch configuration amongst a mosaic  
379 of other natural habitats (i.e., wetlands, shrubland, aspen bluffs, forest patches; Li and Reynolds  
380 1995) instead of fragmentation per se (Andren et al. 1994; Hanski and Ovaskeinan 2002; Fahrig  
381 2003; Betts et al. 2007). For example, both deer mice and thirteen-lined ground squirrels  
382 responded positively to increasing heterogeneity in intact landscapes (deer mouse: >4  
383 patches/100 ha; thirteen-lined ground squirrels: patches 2-4 ha in size in low densities). These  
384 and other species also responded positively to increasing grassland fragmentation where  
385 considerable habitat loss occurred (i.e., >80% LOSS), identifying similar responses among  
386 rodent species between heterogeneous and fragmented landscapes, which has been observed in  
387 other studies (e.g., Jonsen and Fahrig 1997; Holland et al. 2004; Thies et al. 2003; Holzschuh et  
388 al. 2010). This may be because the structural complexity of habitat composition in heterogeneous  
389 landscapes provides a greater diversity of habitat niches through which a higher diversity of

390 rodent species can exploit environmental resources (Bazzaz 1975; Tews et al. 2004; Stein et al.  
391 2014). Several studies of local-level fragmentation effects on biodiversity also observed higher  
392 biodiversity in agroecosystems (e.g., Lack 1969; Bazzaz 1975; Allouche et al. 2011).  
393 Additionally, Fahrig (2017) found over half of all significant fragmentation effects were positive,  
394 suggesting these effects may not be uniformly negative on biodiversity.

395         Habitat specificity may not be a definitive indicator of sensitivity to habitat loss and  
396 fragmentation among rodent species in this study area. None of the rodent species considered  
397 here responded consistently to all fragmentation metrics as predicted by their respective  
398 specificity towards grassland habitat. All grassland obligates except olive-backed pocket mice  
399 failed to decline in abundance with increasing percent habitat loss, and all three grassland  
400 obligates responded positively to at least one metric of increasing grassland fragmentation. These  
401 anomalies may be due to assuming all habitat obligates are dependent on the availability of a  
402 single habitat type. Habitat specificity is a proxy for the trade-off between a species' ability to  
403 exploit a range of resources relative to its capacity to use each resource (i.e., ecological  
404 specialization, or the 'jack of all trades is a master of none' hypothesis; MacArthur 1972; Clavel  
405 et al. 2010). Use of this proxy requires the assumption that the habitat(s) occupied by obligates  
406 encompass all their required biotic and abiotic conditions, while unoccupied habitats are missing  
407 key conditions for population persistence (DeVictor et al. 2010). Some taxonomic groups exhibit  
408 highly ordered responses to habitat loss according to each species' position along habitat  
409 specificity gradients (Patterson and Atmar 1986; Wright et al. 1988; Nupp and Swihart 2000;  
410 Presley et al. 2010), identifying habitat specificity as an effective proxy for ecological  
411 specialization in some cases. Depending on which aspect of fragmentation is under scrutiny,

412 using habitat specificity as a proxy for susceptibility to deleterious effects of habitat loss and  
413 fragmentation may not be informative.

414         Fragmentation effects inconsistent with predictions of habitat specificity gradients may  
415 indicate a mismatch between what constitutes habitat for each species and how habitat is defined  
416 in studies. Habitat is one of the most ambiguous terms used in ecology (Hall et al. 1997; Kearney  
417 2006; Bamford and Calver 2014), referring to all biotic and abiotic conditions influencing  
418 population persistence of a species (Morris 2003). Comparisons of habitat use among species is  
419 facilitated by Hutchinson's concept of the ecological niche, defined as the n-dimensional  
420 hypervolume of resources used, each of which is represented by an axis (i.e., food, water  
421 sources, shelter, parturition sites, etc.; Hutchinson 1957). Along each axis, each species displays  
422 a wide or narrow tolerance or pattern of use relative to other species. A species can therefore be  
423 generalist in the use of some resources but specialist in others (Futuyma and Moreno 1988;  
424 Clavel et al. 2010). Within this context, the use of habitat specificity as a proxy for ecological  
425 specialization is problematic for some species. Habitat is often used synonymously with natural  
426 vegetation cover in fragmentation studies (Almeida-Gomez et al. 2015), which may not  
427 encompass the gradients of resource uses most limiting to the species of interest in highly  
428 fragmented agroecosystems (Fischer and Lindenmeyer 2007; Presley et al. 2010; Betts et al.  
429 2014). For example, olive-backed pocket mice are thought to be restricted to unmodified  
430 grassland habitat throughout their geographic range (Hayward and Killpack 1956; Banfield  
431 1974; Lampe et al. 1974; Wilhelm et al. 1981) but elevated abundances were observed in  
432 modified landscapes with high grassland edge densities. Large populations of this species may  
433 therefore be limited to grassland vegetation in less modified landscapes but released from that  
434 limitation in modified landscapes where individuals may take advantage of increased seed

435 production along grassland-cropland edges. Similarly, northern pocket gophers responded  
436 negatively to up to 40% habitat loss despite being characterized as a habitat generalist. This  
437 fossorial species may not select for vegetative habitat(s) per se but are limited to those that do  
438 not experience intra-annual soil disturbances like annual cropland (Salt 2000). This hypothesis  
439 does not explain the increase in abundance of this species to up to 100% habitat loss. Future  
440 studies should carefully consider which dimension of the ecological niche defines habitat  
441 specificity for all species under study prior to assuming the natural vegetation of the study area  
442 appropriately characterizes resource limitation among all species (Franklin et al. 2005; Fischer  
443 and Lindenmeyer 2007; Flynn et al. 2009; Betts et al. 2014).

444         The use of habitat specificity as a proxy for ecological specialization may have  
445 significant implications for biodiversity conservation when used to inform land modification  
446 policies at a national or international scale. The amount of land modified for global agricultural  
447 production is expected to increase 10–50% by 2050 (Tilman et al. 2001; Tilman et al. 2011),  
448 most likely in developing countries where the world’s biodiversity hotspots remain (Myers et al.  
449 2000; Green et al. 2005). Two strategies, or a combination of both, have been proposed to  
450 conserve these remaining hotspots: 1) promoting agricultural intensification in existing  
451 agroecosystems considered low priority for biodiversity conservation to save remaining  
452 biodiversity hotspots from land modification (i.e., land sparing approach; Green et al. 2005;  
453 Phalan et al. 2011; Tilman et al. 2011), or 2) preventing agricultural intensification by improving  
454 crop yields instead of continued land modification, maintaining mosaics of natural habitats  
455 interspersed among agricultural land-use types where biodiversity conservation is a priority (i.e.,  
456 land sharing approach; Foley et al. 2011; Wright et al. 2012; Mendenhall et al. 2014). Habitat  
457 specificity is now being used to predict biodiversity responses to different conservation

458 strategies, with little to no empirical research to assess its reliability for use to inform global  
459 biodiversity conservation (Green et al. 2005; Cardinale et al. 2012; Baudron and Giller 2013).  
460 For example, Phalan et al. (2011) found more bird and tree species showed lower densities in 1  
461 km<sup>2</sup> plots of modified habitat and advocate for land sparing to conserve large expanses of intact  
462 natural habitat elsewhere. In contrast, Wright et al. (2012) found not all species maintain high  
463 population densities in natural habitats, but some species are now reliant on agricultural land-use  
464 types showing high densities in heavily modified agricultural areas. Both studies fail to recognize  
465 those species whose population persistence is limited by biotic or abiotic conditions not defined  
466 by vegetation, including grassland habitats and agricultural land-use types. Our study finds  
467 species exhibit complex, sometimes contradictory responses to habitat fragmentation dependent  
468 on the magnitude of habitat loss that has occurred that may not be predicted by habitat  
469 specificity. Use of habitat specificity to predict anthropogenic impacts on biodiversity should be  
470 done with caution considering the finality of land modification, or at the very least explicitly  
471 define the specialization gradient of interest.

#### 472 ACKNOWLEDGEMENTS

473 We are grateful to all reviewers for their helpful comments on earlier versions of this manuscript.  
474 Support was provided by the Institute of Environmental Change & Society (IECS), Natural  
475 Sciences and Engineering Research Council of Canada (NSERC; including Discovery Grant  
476 2014-04032 to GLS), Environment & Climate Change Canada, Royal Saskatchewan Museum,  
477 University of Regina, Saskatchewan Innovation & Opportunities, and the Saskatchewan Fish &  
478 Wildlife Development Fund.

#### 479 LITERATURE CITED

- 480 Agriculture and Agri-Food Canada. 2012. Land cover for agricultural regions of Canada, circa  
481 2000. Toronto, Ontario, Canada.
- 482 Agriculture and Agri-Food Canada. 2013. Monthly long-term average precipitation accumulation  
483 for the year. Toronto, Ontario, Canada.
- 484 Almeida-Gomez M, J Augusto Prevedello, and R Crouzeilles. 2015. The use of native vegetation  
485 as a proxy for habitat may overestimate habitat availability in fragmented landscapes.  
486 *Landscape ecology* 31: 711-719.
- 487 Allouche O, M Kalyuzhny, G Moreno-Rueda, and R Kadmon. 2012. Area-heterogeneity tradeoff  
488 and the diversity of ecological communities. *PNAS* 109: 17495-17500.
- 489 Andren H. 1994. Effects of habitat fragmentation on birds and mammals in landscapes with  
490 different proportions of suitable habitat: a review. *Oikos* 71: 355-366.
- 491 Axelrod DI. 1985. Rise of the grassland biome, central North America. *Botanical Review* 51:  
492 163-201.
- 493 Bamford MJ, and MC Calver. 2014. A precise definition of habitat is needed for effective  
494 conservation and communication. *Australian Zoologist* 37: 245-247.
- 495 Banfield AWF. 1974. The mammals of Canada. University of Toronto Press.
- 496 Banks-Leite C, RM Ewers, and JP Metzger. 2010. Edge effects as the principal cause of area  
497 effects on birds in fragmented secondary forest. *Oikos* 119: 918-926.
- 498 Barker WT, and WC Whitman. 1988. Vegetation of the northern Great Plains. *Rangelands* 10:  
499 266-272.
- 500 Barnosky AD, N Matzke, S Tomlya, GOU Wogan, B Swartz, TB Quental, C Marshall, JL  
501 McGuire, EI Lindsey, KC Maguire, B Mersey, and EA Ferrer. 2011. Has the Earth's  
502 sixth mass extinction already arrived? *Nature* 471: 51-57.

- 503 Baudron F and KE Giller. 2014. Agriculture and nature: trouble and strife? *Biological*  
504 *Conservation* 170: 232-245.
- 505 Bazzaz FA. 1975. Plant species diversity in old-field successional ecosystems in southern  
506 Illinois. *Ecology* 56: 485-488.
- 507 Bender DJ, TA Contreras, and L Fahrig. 1998. Habitat loss and population decline: a meta-  
508 analysis of the patch size effect. *Ecology* 79: 517-533.
- 509 Benton TG, JA Vickery, and JD Wilson. 2003. Farmland biodiversity: in habitat heterogeneity  
510 the key? *Trends in Ecology and Evolution* 18: 182-188.
- 511 Betts MG, GJ Forbes, and AW Diamond. 2007. Thresholds in songbird occurrence in relation to  
512 landscape structure. *Conservation Biology* 21: 1046-1058.
- 513 Betts MG, L Fahrig, AS Hadley, KE Halstead, J Bowman, WD Robinson, JA Wiens, and DB  
514 Lindenmayer. 2014. A species-centered approach for uncovering generalities in organism  
515 responses to habitat loss and fragmentation. *Ecography* 37: 517-527.
- 516 Bivand R, T Keitt, and B Rowlingson. 2019. Rgdal: bindings for the geospatial data abstraction  
517 library. R package version 1.4-3. <https://CRAN.R-project.org/package=rgdal>.
- 518 Burnham KP, and DR Anderson. 2002. Model selection and multimodel inference: a practical  
519 information-theoretic approach. Springer, New York.
- 520 Burns CE, and JS Grear. 2008. Effects of habitat loss on populations of white-footed mice:  
521 testing matrix model predictions with landscape-scale perturbation experiments.  
522 *Landscape Ecology* 23: 817-831.
- 523 Cardinale BJ, JE Duffy, A Gonzalez, DU Hooper, C Perrings, P Venail, A Narwani, GM Mace,  
524 D Tilman, DA Wardle, AP Kinzig, GC Daily, M Loreau, JB Grace, A Larigauderie, DS

- 525            Srivastava, and S Naeem. 2012. Biodiversity loss and its impact on humanity. *Nature*  
526            486: 59-68.
- 527    Centre for Land and Biological Resources Research. 1996. *Soil landscapes of Canada*, version  
528            2.2, Research Branch, Agriculture and Agri-Food Canada. Ottawa, Ontario, Canada.
- 529    Chapin FS III, ES Zavaleta, VT Eviners, RL Naylor, PM Vitousek, HL Reynolds, DU Hooper, S  
530            Lavorel, OE Sala, SE Hobbie, MC Mack, and S Diaz. 2000. Consequences of changing  
531            biodiversity. *Nature* 405: 234-242.
- 532    Clavel J, R Julliard, and V Devictor. 2011. Worldwide decline of specialist species: toward a  
533            global functional homogenization? *Frontiers in Ecology and the Environment* 9: 222-228.
- 534    Colvin BA, and SR Spaulding. 1983. Winter foraging behavior of short-eared owls (*Asio*  
535            *flammeus*) in Ohio. *American Midland Naturalist* 110: 124-128.
- 536    Comfort EJ, DA Clark, RG Anthony, J Bailey, MG Betts. 2016. Quantifying edges as gradients  
537            at multiple scales improves habitat selection models for northern spotted owl. *Landscape*  
538            *Ecology* 31: 1227-1240.
- 539    Connor EF, AC Courtney, and JM Yoder. 2000. Individuals-area relationships: the relationship  
540            between animal population density and area. *Ecology* 81: 734-748.
- 541    Coupland RT. 1950. Ecology of mixed prairie in Canada. *Ecological Monographs* 20: 271-315.
- 542    Coupland RT. 1961. A reconsideration of grassland classification in the northern Great Plains of  
543            North America. *Journal of Ecology* 49: 135-167.
- 544    Debinski DM, and RD Holt. 2000. A survey and overview of habitat fragmentation experiments.  
545            *Conservation Biology* 14: 342-355.
- 546    DeVictor V, R Julliard, and F Jiguet. 2008. Distribution of specialist and generalist species along  
547            spatial gradients of habitat disturbance and fragmentation. *Oikos* 117: 507-514.



- 548 DeVicor V, J Clavel, R Julliard, S Lavergne, D Moullet, W Thuiller, P Venail, S Villéger, and N  
549 Mouquet. 2010. Defining and measuring ecological specialization. *Journal of Applied*  
550 *Ecology* 47: 15-25.
- 551 Diaz S, J Fargione, FS Chapin III, and D Tilman. 2006. Biodiversity loss threatens human well-  
552 being. *PLoS Biology* 4: 1300-1305.
- 553 Didham RK, V Kapos, and RM Ewers. 2012. Rethinking the conceptual foundations of habitat  
554 fragmentation research. *Oikos* 121: 161-170.
- 555 Dirzo, HS Young, M Galetti, G Ceballos, NJB Isaac, and B Collen. 2014. Defaunation in the  
556 Anthropocene. *Science* 345: 401-406.
- 557 Eder T, and G Kennedy. 2011. *Mammals of Canada*. Lone Pine Publishing, Edmonton, Alberta.
- 558 Ellis, EC, and N Ramankutty. 2008. Putting people in the map: anthropogenic biomes of the  
559 world. *Frontiers in Ecology and Evolution* 6: 439-447.
- 560 Epstein HE, WK Lauenroth, and IC Burke. 2007. Effects of temperature and soil texture on  
561 ANPP in the US Great Plains. *Ecology* 78: 2628-2631.
- 562 Ewers RM, and RK Didham. 2005. Confounding factors in the detection of species responses to  
563 habitat fragmentation. *Biological Reviews* 81: 117-142.
- 564 Ewers RM, and RK Didham. 2007. Synergistic interactions between edge and area effects in a  
565 heavily fragmented landscape. *Ecology* 88: 96-106.
- 566 Fahrig L. 2002. Effect of habitat fragmentation on the extinction threshold: a synthesis.  
567 *Ecological Applications* 12: 346-353.
- 568 Fahrig L. 2003. Effects of habitat fragmentation on biodiversity. *Annual Reviews in Ecology and*  
569 *Evolutionary Systems* 34: 487-515.
- 570 Fahrig, L, J Baudry, L Brotons, FG Burel, TO Crist, RJ Fuller, C Sirami, GM Siriwardena, JL

- 571           Martin. 2011. Functional landscape heterogeneity and animal biodiversity in agricultural  
572           landscapes. *Ecology Letters* 14: 101-112.
- 573   Fahrig L. 2017. Ecological responses to habitat fragmentation per se. *Annual Reviews of*  
574           *Ecology, Evolution and Systematics* 48: 1-23.
- 575   Fischer J, and DB Lindenmeyer. 2007. Landscape modification and habitat fragmentation: a  
576           synthesis. *Global Ecology and Biogeography* 16: 265-280.
- 577   Fletcher RJ Jr. 2005. Multiple edge effects and their implications in fragmented landscapes.  
578           *Journal of Animal Ecology* 74: 342-352.
- 579   Flynn DFB, M Gogol-Prokurat, T Nogeire, N Molinari, B Trautman Richers, BB Lin, N  
580           Simpson, MM Mayfield, and F DeClerck. 2009. Loss of functional diversity under land  
581           use intensification across multiple taxa. *Ecology Letters* 2009: 22-33.
- 582   Foley AJ, R DeFries, GP Asner, C Barford, G Bonan, SP Carpenter, FS Chapin, MT Coe, GC  
583           Daily, HK Gibbs, JH Helkowski, T Holloway, EA Howard, CJ Kucharik, C Monfreda,  
584           JA Patz, IC Prentice, N Ramankutty, and PK Snyder. 2005. Global consequences of land  
585           use. *Science* 309: 570-574.
- 586   Foley JA, N Ramankutty, KA Brauman, ES Cassidy, JS Gerber, M Johnston, ND Mueller, C  
587           O'Connell, DK Ray, PC West, C Balzer, EM Bennett, SR Carpenter, J Hill, C Monfreda,  
588           S Polasky, J Rockstrom, J Sheeham, S Siebert, D Tilman, and DPM Zaks. 2011.  
589           Solutions for a cultivated planet. *Science* 478: 337-342.
- 590   Franklin AB, BR Noon, and TL George. 2005. What is habitat fragmentation? *Studies in Avian*  
591           *Biology* 25: 20-29.
- 592   Futuyma DJ, and G Moreno. 1988. The evolution of ecological speciation. *Annual review of*  
593           *ecology and systematics* 19: 207-233.

- 594 Gage AM, SK Olimb, and J Nelson. 2016. Plowprint: tracking cumulative cropland expansion to  
595 target grassland conservation. *Great Plains Research* 26: 107-116.
- 596 Grant WE and NR French. 1980. Evaluation of the role of small mammals in grassland  
597 ecosystems: a modeling approach. *Ecological Modeling* 8: 15-37.
- 598 Green RE, SJ Cornell, JPW Scharlemann, and A Balmford. 2005. Farming and the fate of nature.  
599 *Science* 307: 550-555.
- 600 Haddad NM, LA Brudvig, J Clobert, KF Davies, A Gonzalez, RD Holt, TE Lovejoy, JO Sexton,  
601 MP Austin, CD Collins, WM Cook, EI Damschen, RM Ewers, BL Foster, CN Jenkins,  
602 AJ King, WF Laurence, DJ Levey, CR Margules, BA Melbourne, AO Nicholls, JL  
603 Orrock, DX Song, and JR Townsend. 2015. Habitat fragmentation and its lasting impact  
604 on Earth's ecosystems. *Science Advances* 1: 1-9.
- 605 Hall LS, PR Krausman, and ML Morrison. 1997. The habitat concept and a plea for standard  
606 terminology. *Wildlife Society Bulletin* 25: 173-182.
- 607 Hanser SE et al. 2011. Occurrence of small mammals: deer mice and the challenge of trapping  
608 across large spatial extents. Pp. 337-356 in *Sagebrush ecosystems conservation and*  
609 *management: ecoregional assessment tools and models for the Wyoming basins* (SE  
610 Hanser, M Leu, ST Knick, and CL Aldridge, eds.). Allen Press, Lawrence, Kansas.
- 611 Hanski I., and O Ovaskainen. 2002. Extinction debt at extinction threshold. *Conservation*  
612 *Biology* 16: 666-673.
- 613 Hesselbarth MHK, M Sciaini, J Nowosad, and S Hanss. 2019. landscapemetrics: landscape  
614 metrics for categorical map patterns. R package version 1.0. [https://CRAN.R-](https://CRAN.R-project.org/package=landscapemetrics)  
615 [project.org/package=landscapemetrics](https://CRAN.R-project.org/package=landscapemetrics)
- 616 Hasti T, and R Tibshirani. 1990. *Generalized additive models*. Chapman and Hall, New York.

- 617 Hayward CL, and ML Killpack. 1956. Occurrence of *Perognathus fasciatus* in Utah. Journal of  
618 Mammalogy 37: 451-452.
- 619 Hector A, and R Bagchi. 2007. Biodiversity and ecosystem multifunctionality. Nature 448: 188-  
620 191.
- 621 Heisler LM, CM Somers, TI Wellicome, and RG Poulin. 2013. Landscape-scale features  
622 affecting small mammal assemblages on the northern Great Plains of North America.  
623 Journal of Mammalogy 94: 1059-1067.
- 624 Heisler LM, CM Somers, and RG Poulin. 2014. Rodent populations on the northern Great Plains  
625 respond to weather variation at a landscape scale. Journal of Mammalogy 95: 82-90.
- 626 Heisler LM, CM Somers, and RG Poulin. 2016. Owl pellets: a more effective alternative to  
627 conventional trapping for broad-scale studies of small mammal communities. Methods in  
628 Ecology and Evolution 7: 96-103.
- 629 Henle K, KF Davies, M Kleyer, C Margules, and J Settele. 2004. Predictors of species sensitivity  
630 to fragmentation. Biodiversity and Conservation 13: 207-251.
- 631 Hijmans RJ, J Etten, J Cheng, M Mattiuzzi, M Sumner, JA Greenberg, OP Lamigueiro, A Bevan,  
632 EB Racine, A Shortridge, and A Ghosh. 2019. Geographic data analysis and modeling. R  
633 package version 2.8-19. <https://CRAN.R-project.org/package=raster>.
- 634 Hjelle B, and F Torres-Perez. 2010. Hantaviruses in the Americas and their role as emerging  
635 pathogens. Viruses 2: 2559-5286.
- 636 Hoekstra JM, TM Boucher, TH Ricketts, and C Roberts. 2005. Confronting a biome crisis:  
637 global disparities of habitat loss. Ecology Letters 8: 23-29.
- 638 Holland JD, DG Bert, and L Fahrig. 2004. Determining the spatial scale of species' response to  
639 habitat. BioScience 54: 227-233.

- 640 Holzschuh A, I Steffan-Dewenter, and T Tschardt. 2010. How do landscape composition and  
641 configuration, organic farming and fallow strips affect the diversity of bees, wasps and  
642 their parasitoids? *Journal of Animal Ecology* 79: 491-500.
- 643 Hook PB, and IC Burke. 2000. Biogeochemistry in a shortgrass landscape: control by  
644 topography, soil texture, and microclimate. *Ecology* 81: 2686-2703.
- 645 Hutchinson GE. 1957. The multivariate niche. *Cold Springs Harbour Symposium on*  
646 *Quantitative Biology* 22: 415-421.
- 647 Jonsen ID, and L Fahrig. 1997. Response of generalist and specialist insect herbivores to  
648 landscape spatial structure. *Landscape Ecology* 12: 185-197.
- 649 Jonsson CB, LT Moraes Figueiredo, and O Vapalahti. 2010. A global perspective on hantavirus  
650 ecology, epidemiology, and disease. *Clinical Microbiology Reviews* 23: 412-441.
- 651 Kearney M. 2006. Habitat, environment, and niche: what are we modelling? *Oikos* 115: 186-191.
- 652 Keinath DA, DF Doak, KE Hodges, LR Prugh, W Fagan, CH Sekercioglu, SHM Buchart, and M  
653 Kauffman. 2017. A global analysis of traits predicting species sensitivity to habitat  
654 fragmentation. *Global Ecology and Biogeography* 26: 115-127.
- 655 Korpimäki E, PR Brown, J Jacob, and RP Pech. 2004. The puzzles of population cycles and  
656 outbreaks of small mammals solved? *BioScience* 54: 1071-1079.
- 657 Lack D. 1969. The numbers of bird species on islands. *Bird Study* 16: 193-209.
- 658 Lampe RP, JK Jones Jr, RS Hoffman, and EC Birney. 1974. The mammals of Carter County,  
659 southeastern Montana. *Occasional Papers of Museum Natural History, University of*  
660 *Kansas* 25: 1-39.

- 661 Lane DR, DP Coffin, and WK Lauenroth. 1998. Effects of soil texture and precipitation on  
662 above-ground productivity and vegetation structure across the central grassland region of  
663 the United States. *Journal of Vegetation Science* 9: 239-250.
- 664 Li H and JF Reynolds. 1995. On definition and quantification of heterogeneity. *Oikos* 73: 280-  
665 284.
- 666 MacArthur RH. 1972. *Geographical ecology*. Harper & Row, New York, NY.
- 667 Marvier M, P Kareiva, and MG Neubert. 2004. Habitat destruction, fragmentation, and  
668 disturbance promote invasion by habitat generalists in a multispecies metapopulation.  
669 *Risk Analysis* 24: 869-878.
- 670 Massa C, P Teta, and G Ruben Cueto. 2013. Effects of regional context and landscape  
671 composition on diversity and composition of small rodent assemblages in Argentinian  
672 temperate grasslands and wetlands. *Mammalia* 78: 371-382.
- 673 McKinney ML, and JL Lockwood. 1999. Biotic homogenization: a few winners replacing many  
674 losers in the next mass extinction. *Trends in Ecology and Evolution* 14: 450-453.
- 675 McNaughton SJ. 1977. Diversity and stability of ecological communities: a comment on the role  
676 of empiricism in ecology. *The American Naturalist* 111: 515-525.
- 677 Mendenhall CD, DS Karp, CFJ Meyer, EA Hadly, and GC Daily. 2014. Predicting biodiversity  
678 change and averting collapse in agricultural landscapes. *Nature* 509: 213-217.
- 679 Mills JN. 2005. Regulation of rodent-borne viruses in the natural host: implications for human  
680 disease. *Archives of Virology* 19: 45-57.
- 681 Mills JN, and JE Childs. 1998. Ecologic studies of rodent reservoirs: their relevance for human  
682 health. *Emerging Infectious Diseases* 4: 529-537.

- 683 Morris DW. 2003. Toward an ecological synthesis: a case for habitat selection. *Oecologia* 136:  
684 1-13.
- 685 Myers N, RA Mittermeier, CG Mittermeier, GAB da Fonseca, and J Kent. 2000. Biodiversity  
686 hotspots for conservation priorities. *Nature* 403: 853-858.
- 687 Nupp TE, and RK Swihart. 2000. Landscape-level correlates of small-mammal assemblages in  
688 forest fragments of farmland. *Journal of Mammalogy* 81: 512-526.
- 689 Ostfeld RS and RD Holt. 2004. Are predators good for your health? Evaluating evidence for top-  
690 down regulation of zoonotic disease reservoirs. *Frontiers in Ecology and the Environment*  
691 2: 13-20.
- 692 Patterson BD, and W Atmar. 1986. Nested subsets and the structure of insular mammalian  
693 faunas and archipelagos. *Biological Journal of the Linnean Society* 28: 65-82.
- 694 Pena NM, A Butet, Y Delettre, G Paillat, P Morant, L Le Du, and F Burel. 2003. Response of the  
695 small mammal community to changes in western French agricultural landscape.  
696 *Landscape Ecology* 18: 265-278.
- 697 Phalan B, M Onial, A Balmford, RE Green. 2011. Reconciling food production and biodiversity  
698 conservation: land sharing and land sparing compared. *Science* 333: 1289-1291.
- 699 Pimm SL, GJ Russel, JL Gittelman, and TM Brooks. 1995. The future of biodiversity. *Science*  
700 269: 347-350.
- 701 Poulin RG, TI Wellicome, and LD Todd. 2001. Synchronous and delayed numerical responses of  
702 a predatory bird community to a vole outbreak on the Canadian Prairies. *Journal of*  
703 *Raptor Research* 35: 288-295.
- 704 Presley SJ, CL Higgins, and MR Willig. 2010. A comprehensive framework for the evaluation of  
705 metacommunity structure. *Oikos* 119: 908-917.

- 706 R Development Core Team. 2017. R: a language and environment for statistical computing. R  
707 Foundation for Statistical Computing, Vienna, Austria.
- 708 Ramsay TO, RT Burnett, and D Krewski. 2003. The effect of concurvity in generalized additive  
709 models linking mortality to ambient particulate matter. *Epidemiology* 14: 18-23.
- 710 Reino L, P Beja, MB Araújo, S Dray, and P Segurado. 2014. Does local habitat fragmentation  
711 affect large-scale distributions? The case of a specialist grassland bird. *Biodiversity*  
712 *Research* 19: 423-432.
- 713 Rigby RA, and DM Stasinopoulos. 2005. Generalized additive models for location, scale and  
714 shape, (with discussion). *Applied Statistics* 54: 507-554.
- 715 Roch L, and JAG Jaeger. 2014. Monitoring an ecosystem at risk: what is the degree of grassland  
716 fragmentation in the Canadian Prairies? *Environmental Monitoring and Assessment* 186:  
717 2505-2534.
- 718 Rodríguez C, and SJ Peris. 2007. Habitat associations of small mammals in farmed landscapes:  
719 implications for agri-environmental schemes. *Animal Biology* 57: 301-314.
- 720 Salt JR. 2000. Pocket gopher/mouse associations on the Milk river grasslands. *Blue Jay* 58: 139-  
721 143.
- 722 Samson FB and FL Knopf. 1994. Prairie conservation in North America. *BioScience* 44: 418-  
723 421.
- 724 Samson FB, FL Knopf, and WR Ostlie. 2004. Great Plains ecosystems: past, present, and future.  
725 *Wildlife Society Bulletin* 32: 6-15.
- 726 Sieg CH. 1987. Small mammals: pests or vital components of the ecosystem. Paper presented at  
727 the 8<sup>th</sup> wildlife damage control workshop, April 26-30, 1987. Rapid City, South Dakota.
- 728 Smoliak S. 1988. The northern Great Plains – Canadian connection. *Rangelands* 10: 210-212.



- 729 Soil Landscapes of Canada Working Group. 2010. Soil landscapes of Canada version 3.2.  
730 Agricultural and Agri-Food Canada (digital map and database at 1:1 million scale).
- 731 Tews, J, U Brose, V Grimm, K Tielbörger, MC Wichmann, M Schwager, and F Jeltsch. 2004.  
732 Animal species diversity driven by habitat heterogeneity/diversity: the importance of  
733 keystone structures. *Journal of Biogeography* 31: 79-92.
- 734 Thies C, I Steffan-Dewenter, and T Tschardt. 2003. Effects of landscape context on herbivory  
735 and parasitism at different spatial scales. *Oikos* 101: 18-25.
- 736 Tilman D, RM May, CL Lehman, MA Nowak. 1994. Habitat destruction and the extinction debt.  
737 *Nature* 371: 65-66.
- 738 Tilman D, J Fargione, B Wolff, C D'Antonio, A Dobson, R Howarth, D Schindler, WH  
739 Schlesinger, D Simberloff, and D Swackhamer. 2001. Forecasting agriculturally driven  
740 global environmental change. *Science* 292: 281-284.
- 741 Tilman D, C Balzer, J Hill, and BL Befort. 2011. Global food demand and the sustainable  
742 intensification of agriculture. *Proceedings of the National Academy of Sciences* 108:  
743 20260-20264.
- 744 Todd LD, RG Poulin, TI Wellicome, and RM Brigham. 2001. Post-fledging survival of  
745 burrowing owls in Saskatchewan. *Journal of Wildlife Management* 67: 512-519.
- 746 Torre I, L Gracia-Quintas, A Arrizabalaga, J Baucells, and M Diaz. 2015. Are recent changes in  
747 the terrestrial small mammal communities related to land use change? A test using pellet  
748 analyses. *Ecological Research* 30: 813-819.
- 749 Tylianakis JM, RK Didham, J Bascompte, and DA Wardle. 2008. Global change species  
750 interaction in terrestrial ecosystems. *Ecology Letters* 11: 1351-1363.

- 751 VanDerWal J, L Falconi, S Januchowski, and C Storlie. 2015. SDMTools: species distribution  
752 modelling tools: tools for processing data associated with species distribution modelling  
753 exercises. R package version 1.1-13. 2012. [http://CRAN.R-](http://CRAN.R-project.org/package=SDMTools)  
754 [project.org/package=SDMTools](http://CRAN.R-project.org/package=SDMTools).
- 755 Virginia RA, and DH Wall. 2001. Principles of ecosystem function. Encyclopedia of  
756 Biodiversity 2: 345-352.
- 757 Vitousek, PM, HA, Mooney, J. Lubchenco, and J.M. Melillo. 1997. Human domination of  
758 Earth's ecosystems. Science 277: 494-499.
- 759 White R, S Murray, and M Rohweder. 2000. Pilot analysis of global ecosystems: grassland  
760 ecosystems. World Resources Institute.
- 761 White TCR. 2013. Experimental and observational evidence reveals that predators in natural  
762 environments do not regulate their prey: they are passengers, not drivers. Acta  
763 Oecologica 53: 73-87.
- 764 Wilhelm RB, JR Choate, and JK Jones. 1981. Mammals of Lacreek national wildlife refuge,  
765 South Dakota. Special Publications Museum of Texas Tech University 17: 1-39.
- 766 Wilson MC, XY Chen, RT Corlett, RK Didham, P Ding, RD Holt, M Holyoak, G Hu, AC  
767 Hughes, L Jiang, WF Laurance, J Liu, SL Pimm, SK Robinson, SE Russo, X Si, DS  
768 Wilcove, J Wu, and M Yu. 2016. Habitat fragmentation and biodiversity conservation:  
769 key findings and future challenges. Landscape Ecology 31: 219-227.
- 770 Wood SN, N Pya, and B Säfken. 2016. Smoothing parameter and model selection for general  
771 smooth models. Journal of the American Statistical Association 111: 1548-1563.
- 772 Wright HL, IR Lake, and PM Dolman. 2012. Agriculture – a key element for conservation in the  
773 developing world. Conservation Letters 5: 11-19.

- 774 Zuur AF, EN Ieno, NJ Walker, AA Saveliev, and GM Smith. 2009. Mixed effects models and  
775 extensions in ecology with R. Springer, New York.
- 776 Zuur AF. 2012. A beginner's guide to generalized additive models with R. Highland Statistics  
777 Ltd., Newbrough, United Kingdom.
- 778

779 FIG. 1 Distribution of owl pellet collection locations (black dots) in grasslands modified for  
780 agricultural use (cropland = shaded light grey; grassland = dark grey) in Alberta (left),  
781 Saskatchewan (middle), and Manitoba (right; lines = provincial boundaries) of Canada. Major  
782 cities in Alberta (i.e., Calgary and Edmonton) and Saskatchewan (i.e., Regina and Saskatoon) are  
783 given for reference. White areas represent waterbodies and regions outside the study area.

784 FIG. 2 Estimated effect of habitat loss (%; including cropland, perennial livestock forage, and  
785 urban and industrial land use types) on **(a)** olive-backed pocket mouse, **(b)** deer mouse, and **(c)**  
786 northern pocket gopher abundances across the Canadian Prairies. Trends were modeled on the  
787 scale of the linear predictor (solid black line; dotted black line indicates no effect) with 95%  
788 confidence intervals (grey shade).

789 FIG. 3 Responses to fragmentation effects that were consistent with predictions based on habitat  
790 specificity, including the estimated effect of **(a)** grassland patch cohesion (%) and **(b)** grassland  
791 edge density (m/ha) on thirteen-lined ground squirrel abundances across the Canadian Prairies.  
792 Trends were modeled on the scale of the linear predictor (solid black line; dotted black line  
793 indicates no effect) with 95% confidence intervals (grey shade).

794 FIG. 4 Responses to fragmentation effects independent of habitat loss that were consistent with  
795 predictions based on habitat specificity, including the estimated effect of **(a)** average grassland  
796 patch area (ha) on northern grasshopper mouse abundance and **(b)** grassland patch density (#  
797 patches/100 ha) on northern pocket gopher abundance across the Canadian Prairies. Trends  
798 were modeled on the scale of the linear predictor (white contour lines; positive effects shaded  
799 light, negative effects shaded dark).

800 FIG. 5 Responses to fragmentation effects that were inconsistent with predictions based on  
801 habitat specificity, including the estimated effect of **(a)** grassland patch cohesion (%) on

802 sagebrush vole abundance, the effects of **(b)** grassland patch cohesion, **(c)** grassland edge  
803 density (m/ha), and **(d)** grassland patch shape complexity on deer mouse abundance, and the  
804 effects of **(e)** grassland patch density (# patches/100 ha) on northern grasshopper mouse  
805 abundance. Trends were modeled on the scale of the linear predictor (white contour lines;  
806 positive effects shaded light, negative effects shaded dark).

807 FIG. 6 Responses to fragmentation effects independent of habitat loss that were inconsistent with  
808 predictions based on habitat specificity, including the estimated effect of **(a)** average grassland  
809 patch area (ha) on sagebrush vole abundance, **(b)** grassland patch density (# patches/100 ha) on  
810 thirteen-lined ground squirrel abundance, **(c)** grassland edge density (m/ha) on olive-backed  
811 pocket mouse abundance, and **(d)** grassland patch density (# patches/100 ha) on northern pocket  
812 gopher abundance. Trends were modeled on the scale of the linear predictor (white contour  
813 lines; positive effects shaded light, negative effects shaded dark).

814 FIG. 7 Responses to habitat heterogeneity in landscapes where <20% habitat loss has occurred,  
815 including the estimated effect of **(a)** average grassland patch area (ha) on sagebrush vole  
816 abundance and grassland patch density (# patches/100 ha) on **(b)** olive-backed pocket mouse  
817 abundance, **(c)** thirteen-lined ground squirrel abundance, and **(d)** deer mouse abundance. Trends  
818 were modeled on the scale of the linear predictor (white contour lines; positive effects shaded  
819 light, negative effects shaded dark).

820

821 TABLE 1 Frequency among samples (N) and abundance (Total) of rodent species estimated from  
 822 great horned (GHOW) and burrowing owl (BUOW) pellet samples. Characterization as  
 823 grassland obligates (Grass) or habitat generalists (General) based on habitat descriptions in Eder  
 824 and Kennedy (2011).

| Common Name                                                           | Habitat<br>Specialization | N     | Total  | BUOW   | GHOW   |
|-----------------------------------------------------------------------|---------------------------|-------|--------|--------|--------|
| Deer mouse<br><i>(Peromyscus maniculatus)</i>                         | General                   | 1,363 | 48,348 | 24,205 | 24,143 |
| Meadow vole<br><i>(Microtus pennsylvanicus)</i>                       | Grass                     | 1,182 | 15,270 | 8,695  | 6,575  |
| Sagebrush vole<br><i>(Lemmyscus curtatus)</i>                         | Grass                     | 729   | 7,790  | 5,198  | 2,592  |
| Northern grasshopper mouse<br><i>(Onychomys leucogaster)</i>          | General                   | 488   | 2,738  | 525    | 2,213  |
| Olive-backed pocket mouse<br><i>(Perognathus fasciatus)</i>           | Grass                     | 377   | 1,926  | 829    | 1,097  |
| Richardson's ground squirrel<br><i>(Urocitellus richardsonii)</i>     | Grass                     | 242   | 471    | 230    | 241    |
| Northern pocket gopher<br><i>(Thomomys talpoides)</i>                 | General                   | 126   | 648    | 179    | 469    |
| Thirteen-lined ground squirrel<br><i>(Ictidomys tridecemlineatus)</i> | Grass                     | 70    | 302    | 26     | 276    |
| Prairie vole                                                          | Grass                     | 29    | 170    | 2      | 168    |

---

*(Microtus ochragaster)*

|                    |       |   |    |   |    |
|--------------------|-------|---|----|---|----|
| Ord's kangaroo rat | Grass | 9 | 27 | 7 | 20 |
|--------------------|-------|---|----|---|----|

*(Dipodomys ordii)*

|                  |         |   |   |   |   |
|------------------|---------|---|---|---|---|
| Long-tailed vole | General | 6 | 7 | 0 | 7 |
|------------------|---------|---|---|---|---|

*(Microtus longicaudatus)*

---

825

826

827 TABLE 2 Average (+/- standard deviation) percent habitat loss (LOSS), habitat fragmentation  
 828 (i.e., average grassland patch area (AREA), grassland edge density (ED), average grassland  
 829 patch shape edge to area ratio (PARA), grassland patch density (PD), and grassland patch  
 830 cohesion (COH)), habitat composition (cropland (CROP), grassland (GRASS), perennial  
 831 livestock forage (TAME), urban development (URBAN), riparian areas (WET), and woody  
 832 vegetation (WOOD), climate (total growing degrees >5 °C (GDD5), summer rainfall (RAIN),  
 833 and winter snowfall (SNOW)), and soil texture (sand (SAND)) within a 2.5 km radius from  
 834 each burrowing owl and great horned owl pellet collection location. Fragmentation metrics were  
 835 taken from VanDerWal 2015.

| Environmental Conditions |               | Burrowing Owl  | Great Horned       | All            |
|--------------------------|---------------|----------------|--------------------|----------------|
|                          |               | Foraging Range | Owl Foraging Range | Pellet Samples |
| Habitat composition      | GRASS (%)     | 31.9 (34.0)    | 15.2 (20.8)        | 28.0 (32.2)    |
|                          | CROP (%)      | 48.5 (33.6)    | 62.2 (27.4)        | 51.7 (32.8)    |
|                          | TAME (%)      | 11.2 (14.6)    | 13.6 (15.5)        | 11.8 (14.8)    |
|                          | URBAN (%)     | 3.3 (10.1)     | 2.7 (2.5)          | 3.2 (8.9)      |
|                          | WET (%)       | 2.7 (4.7)      | 2.7 (4.6)          | 2.7 (4.7)      |
|                          | WOOD (%)      | 1.4 (2.1)      | 2.5 (2.7)          | 1.7 (2.5)      |
| Habitat configuration    | LOSS (%)      | 63.0 (36.2)    | 78.5 (23.4)        | 66.6 (34.3)    |
|                          | AREA (ha)     | 2.9 (2.2)      | 1.9 (1.5)          | 2.7 (2.1)      |
|                          | ED (m/ha)     | 12.4 (11.7)    | 14.1 (12.2)        | 12.8 (11.9)    |
|                          | PARA          | 0.05 (0.04)    | 0.06 (0.03)        | 0.05 (0.04)    |
|                          | PD (#/100 ha) | 0.9 (1.2)      | 1.4 (1.5)          | 1.0 (1.3)      |



|         |           |               |                |               |
|---------|-----------|---------------|----------------|---------------|
|         | COH (%)   | 78.8 (34.0)   | 77.9 (29.6)    | 78.6 (33.1)   |
|         | SAND (%)  | 30.8 (23.3)   | 36.7 (19.5)    | 32.2 (22.6)   |
| Abiotic | GDD5 (°C) | 1529.9 (46.6) | 1448.4 (106.8) | 1510.9 (74.2) |
|         | RAIN (mm) | 235.5 (23.8)  | 242.3 (30.6)   | 237.1 (25.7)  |
|         | SNOW (mm) | 116.8 (13.0)  | 117.8 (17.4)   | 117.1 (14.2)  |

836

837

838 TABLE 3 Model performance of fitted generalized additive models estimating change in  
 839 abundance of each rodent species to habitat loss and fragmentation on the Canadian Prairies.  
 840 The number of samples used to model each species' response (N) differed among species  
 841 because only samples within each species' geographic range were used. All species models  
 842 were fit using mgcv, except the deer mouse and sagebrush vole models, which were fit using  
 843 gamlss. Statistical influence of each model was estimated by subtracting the Akaike Information  
 844 Criterion (AIC) of each fitted model from the AIC of each corresponding null model ( $\Delta$ AIC).  
 845 Only models  $>10$   $\Delta$ AIC units from the null model were considered. The strength of each fitted  
 846 model was estimated by deviance explained (DE). The strength of habitat loss and  
 847 fragmentation effects alone in each model was estimated by subtracting the DE of each null  
 848 model from that of each corresponding fitted model ( $\Delta$ DE).

| Species                        | Habitat        |       | $\Delta$ AIC | $\Delta$ DE | DE   |
|--------------------------------|----------------|-------|--------------|-------------|------|
|                                | specialization | N     |              | (%)         | (%)  |
| Sagebrush vole                 | Grass          | 1,327 | 188          | 10.0        | 44.3 |
| Deer mouse                     | General        | 1,384 | 134          | 6.7         | 57.0 |
| Thirteen-lined ground squirrel | Grass          | 1,384 | 110          | 7.8         | 81.8 |
| Olive-backed pocket mouse      | Grass          | 1,094 | 77           | 10.2        | 35.3 |
| Northern pocket gopher         | General        | 1,384 | 35           | 7.0         | 62.9 |
| Northern grasshopper mouse     | General        | 1,372 | 22           | 2.4         | 40.3 |
| Richardson's ground squirrel   | Grass          | 1,384 | 10           | n/a         | n/a  |
| Long-tailed vole               | General        | 265   | 1            | n/a         | n/a  |
| Ord's kangaroo rat             | Grass          | 263   | -1           | n/a         | n/a  |
| Prairie vole                   | Grass          | 654   | -1           | n/a         | n/a  |

|             |       |       |      |     |     |
|-------------|-------|-------|------|-----|-----|
| Meadow vole | Grass | 1,384 | -256 | n/a | n/a |
|-------------|-------|-------|------|-----|-----|

---

849

TABLE 4 Summary statistics for generalized additive models of the influence of habitat loss and fragmentation on rodent species abundances across the Canadian Prairies. Predictors include habitat loss (LOSS), grassland edge density (ED), average grassland patch size (AREA), average grassland patch shape complexity (PARA), grassland patch density (PD), and grassland patch cohesion (COH). ED, AREA, PARA, PD, and COH were included in models as interactions with LOSS to account for the dependence of fragmentation effects on the presence of habitat loss. Bolded predictors are significant at  $p < 0.001$  as identified by the F-statistic (F) and estimated degrees of freedom (EDF). These models form the analytical basis for Figures 2-9.

| Species        | Predictor | Main Effects         |            |                            | Effect Mediated by LOSS |            |                            |
|----------------|-----------|----------------------|------------|----------------------------|-------------------------|------------|----------------------------|
|                |           | edf                  | F          | p value                    | edf                     | F          | p value                    |
| Deer mouse     | LOSS      | <b>2.4</b>           | <b>2.5</b> | <b>0.0005</b>              | n/a                     | n/a        | n/a                        |
|                | ED        | <b>3.7</b>           | <b>6.5</b> | <b>3.4x10<sup>-7</sup></b> | 5.7                     | 0.8        | 0.01                       |
|                | AREA      | 2.5                  | 1.4        | 0.03                       | 5.5x10 <sup>-7</sup>    | 0.0        | 0.6                        |
|                | PARA      | <b>2.2</b>           | <b>3.5</b> | <b>0.0001</b>              | 5.4                     | 1.1        | 0.0002                     |
|                | PD        | 1.9                  | 1.1        | 0.04                       | <b>7.5</b>              | <b>2.1</b> | <b>4.0x10<sup>-5</sup></b> |
|                | COH       | <b>1.6</b>           | <b>3.9</b> | <b>6.8x10<sup>-6</sup></b> | <b>3.0</b>              | <b>1.2</b> | <b>9.3x10<sup>-5</sup></b> |
| Sagebrush vole | LOSS      | 1.2x10 <sup>-6</sup> | 0.0        | 0.4                        | n/a                     | n/a        | n/a                        |
|                | ED        | 8.1x10 <sup>-7</sup> | 0.0        | 0.6                        | 0.005                   | 0.0        | 0.3                        |

|                            |      |                      |             |                             |            |             |                             |
|----------------------------|------|----------------------|-------------|-----------------------------|------------|-------------|-----------------------------|
|                            | AREA | 1.8x10 <sup>-7</sup> | 0.0         | 0.8                         | <b>2.0</b> | <b>2.4</b>  | <b>6.9x10<sup>-10</sup></b> |
|                            | PARA | 1.5x10 <sup>-7</sup> | 0.0         | 1.0                         | 1.0        | 0.2         | 0.06                        |
|                            | PD   | 8.1x10 <sup>-7</sup> | 0.0         | 1.0                         | 1.6        | 0.4         | 0.02                        |
|                            | COH  | <b>2.0</b>           | <b>30.0</b> | <b>2.0x10<sup>-16</sup></b> | 3.0        | 0.5         | 0.05                        |
| Northern grasshopper mouse | LOSS | 0.0003               | 0.0         | 0.6                         | n/a        | n/a         | n/a                         |
|                            | ED   | 0.0002               | 0.0         | 0.9                         | 0.0002     | 0.0         | 0.6                         |
|                            | AREA | 0.0001               | 0.0         | 0.5                         | <b>1.0</b> | <b>19.2</b> | <b>3.3x10<sup>-7</sup></b>  |
|                            | PARA | 0.7                  | 1.9         | 0.06                        | 0.001      | 0.001       | 0.4                         |
|                            | PD   | <b>1.5</b>           | <b>8.4</b>  | <b>0.0008</b>               | 0.9        | 1.7         | 0.1                         |
|                            | COH  | 0.0001               | 0.0         | 1.0                         | 2.1        | 4.5         | 0.07                        |
| Olive-backed pocket mouse  | LOSS | <b>2.9</b>           | <b>43.2</b> | <b>1.0x10<sup>12</sup></b>  | n/a        | n/a         | n/a                         |
|                            | ED   | 0.2                  | 0.3         | 0.2                         | <b>1.5</b> | <b>19.2</b> | <b>1.9x10<sup>-7</sup></b>  |
|                            | AREA | 0.0002               | 0.0         | 0.8                         | 0.0004     | 0.0         | 0.6                         |
|                            | PARA | 0.0002               | 0.0         | 0.8                         | 0.6        | 1.3         | 0.09                        |
|                            | PD   | 0.0002               | 0.0         | 0.7                         | <b>4.3</b> | <b>18.9</b> | <b>0.0001</b>               |
|                            | COH  | 0.0003               | 0.0         | 0.7                         | 2.2        | 10.0        | 0.001                       |

|                                |      |                      |             |                             |                      |             |                             |
|--------------------------------|------|----------------------|-------------|-----------------------------|----------------------|-------------|-----------------------------|
| Northern pocket gopher         | LOSS | <b>1.7</b>           | <b>13.2</b> | <b>5.8x10<sup>-5</sup></b>  | n/a                  | n/a         | n/a                         |
|                                | ED   | 6.9x10 <sup>-5</sup> | 0.0         | 0.7                         | 0.7                  | 1.6         | 0.08                        |
|                                | AREA | 8.0x10 <sup>-5</sup> | 0.0         | 0.5                         | 0.0001               | 0.0         | 0.5                         |
|                                | PARA | 7.3x10 <sup>-5</sup> | 0.0         | 0.9                         | 0.0001               | 0.0         | 0.9                         |
|                                | PD   | 5.4x10 <sup>-5</sup> | 0.0         | 0.8                         | <b>4.2</b>           | <b>14.4</b> | <b>0.0008</b>               |
|                                | COH  | <b>0.9</b>           | <b>8.1</b>  | <b>0.001</b>                | 0.0001               | 0.0         | 0.8                         |
| Thirteen-lined ground squirrel | LOSS | 0.09                 | 0.1         | 0.1                         | n/a                  | n/a         | n/a                         |
|                                | ED   | <b>2.4</b>           | <b>34.1</b> | <b>1.9x10<sup>-12</sup></b> | 6.8x10 <sup>-5</sup> | 0.0         | 0.8                         |
|                                | AREA | 5.4x10 <sup>-5</sup> | 0.0         | 1.0                         | <b>2.8</b>           | <b>12.3</b> | <b>1.4x10<sup>-5</sup></b>  |
|                                | PARA | <b>2.9</b>           | <b>16.5</b> | <b>2.5x10<sup>-5</sup></b>  | 1.8                  | 5.4         | 0.01                        |
|                                | PD   | 1.6x10 <sup>-5</sup> | 0.0         | 0.6                         | <b>9.6</b>           | <b>55.5</b> | <b>1.2x10<sup>-13</sup></b> |
|                                | COH  | <b>0.9</b>           | <b>9.8</b>  | <b>3.0x10<sup>-5</sup></b>  | 2.5                  | 4.7         | 0.02                        |

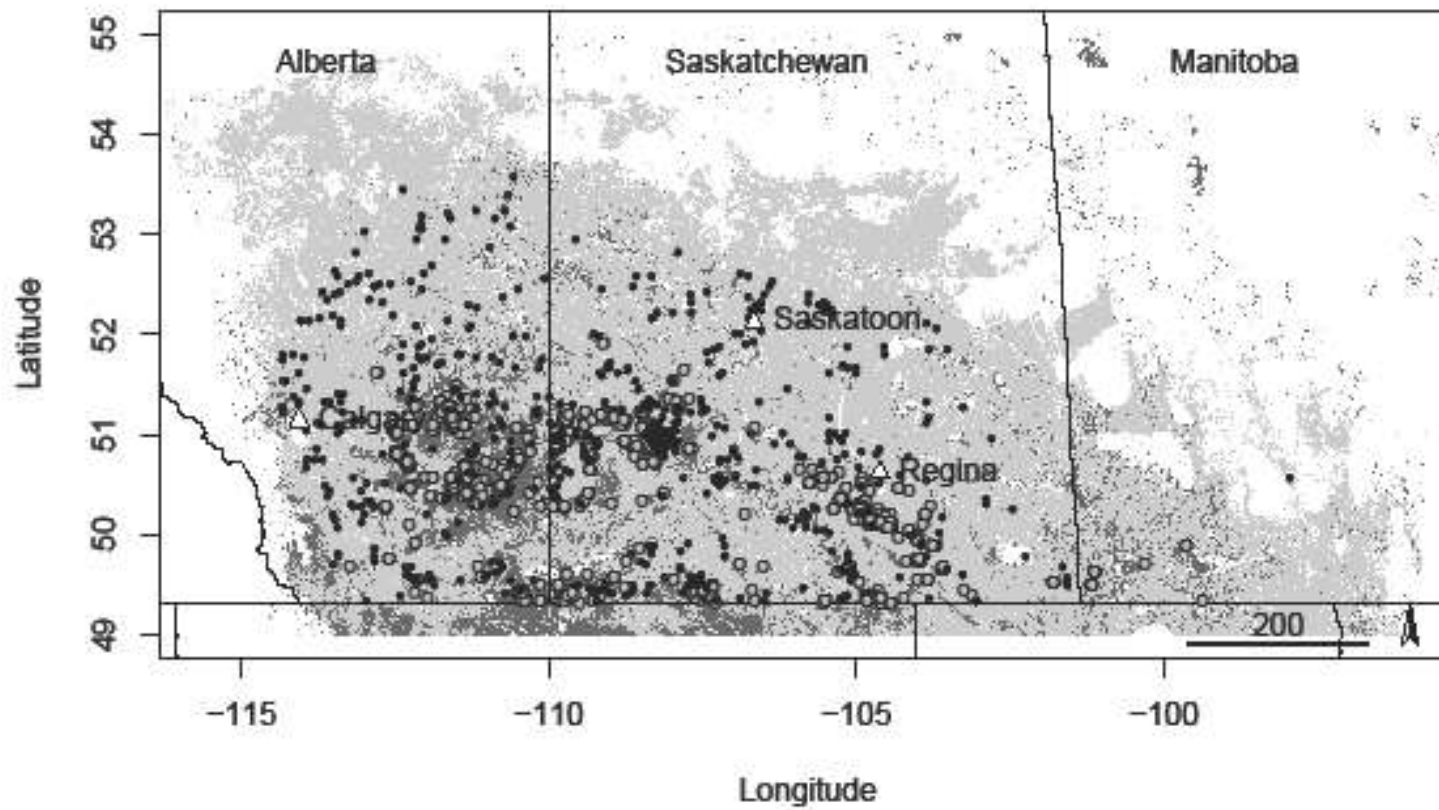

Figure 1.

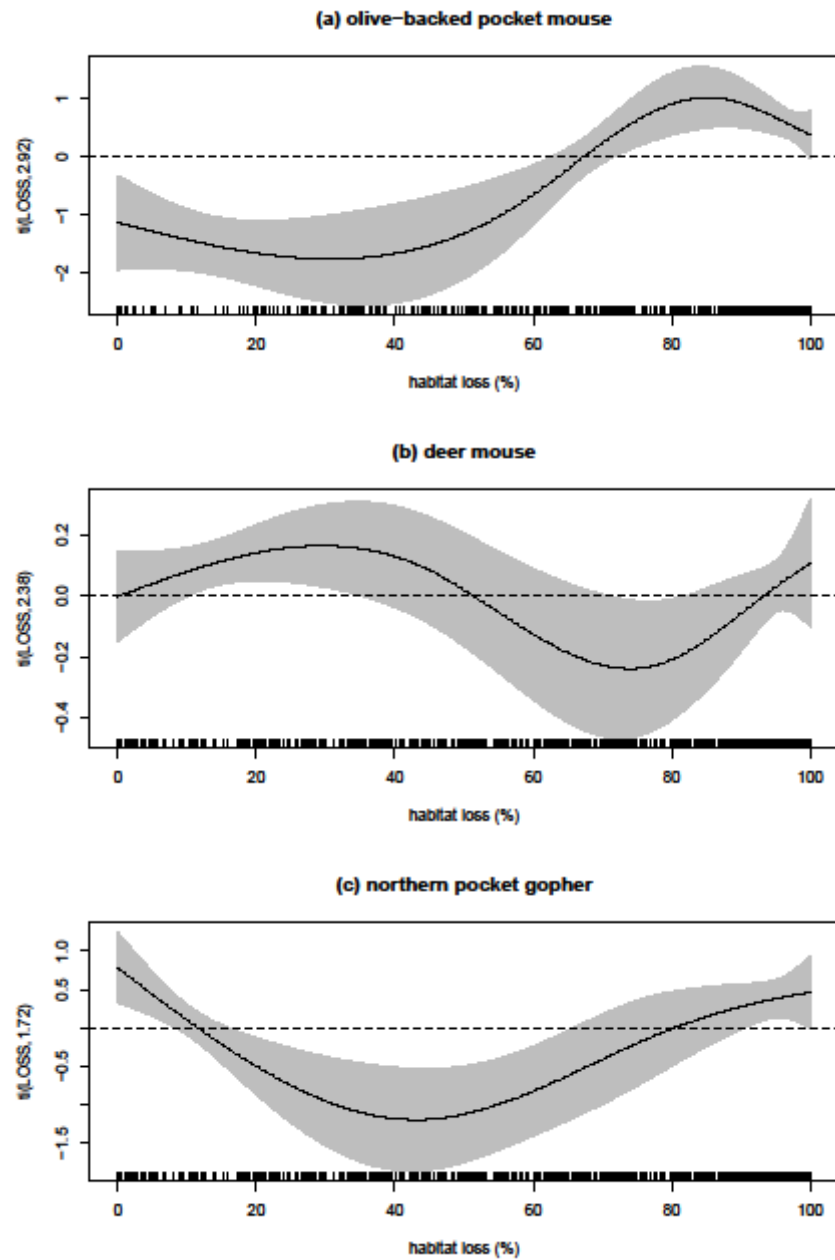

Figure 2.



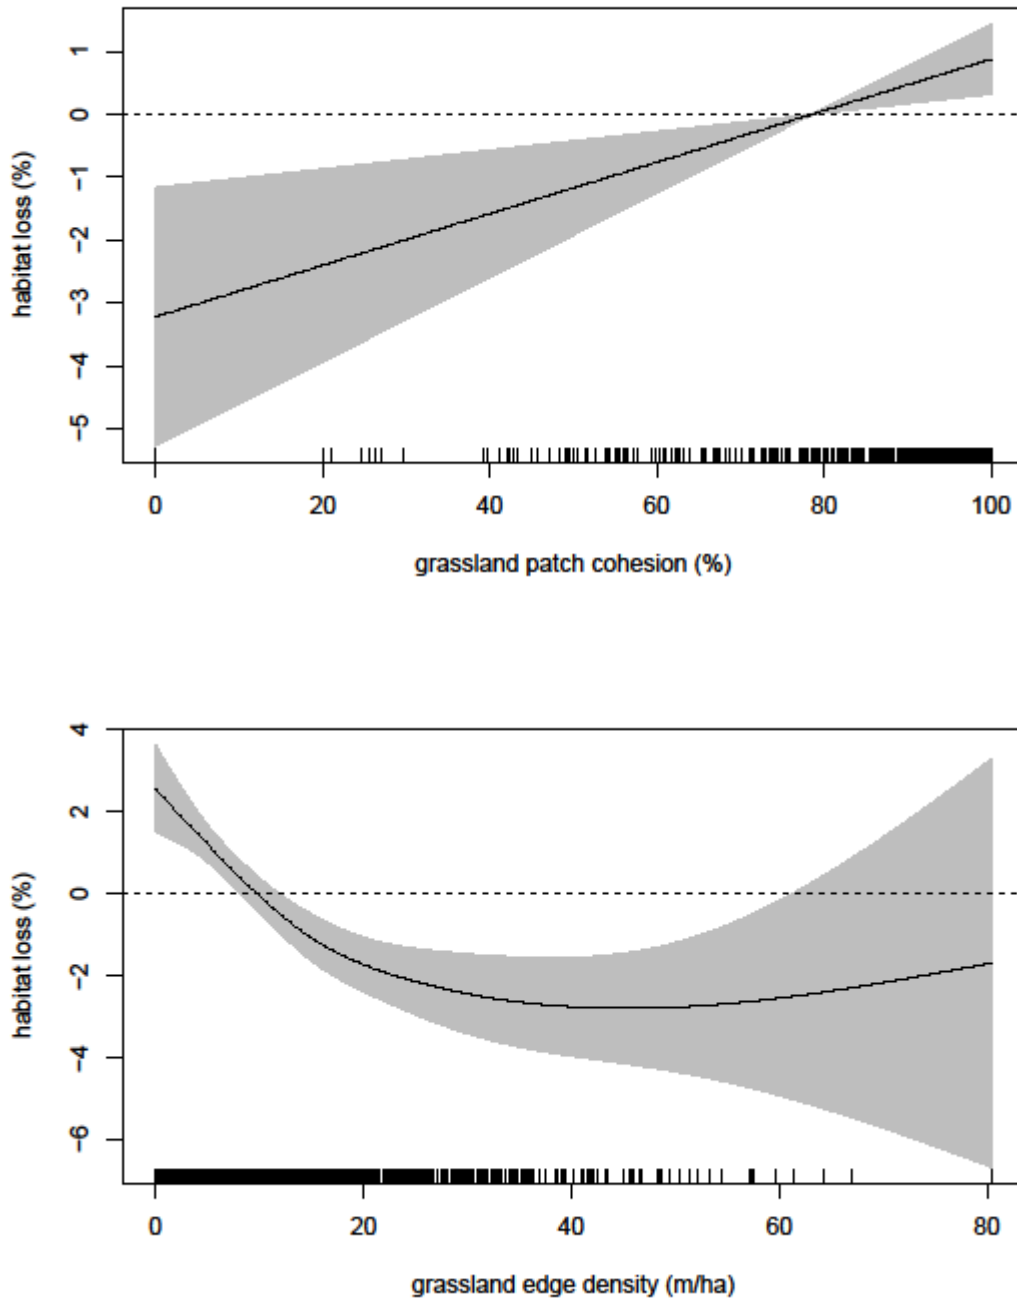

Figure 3.

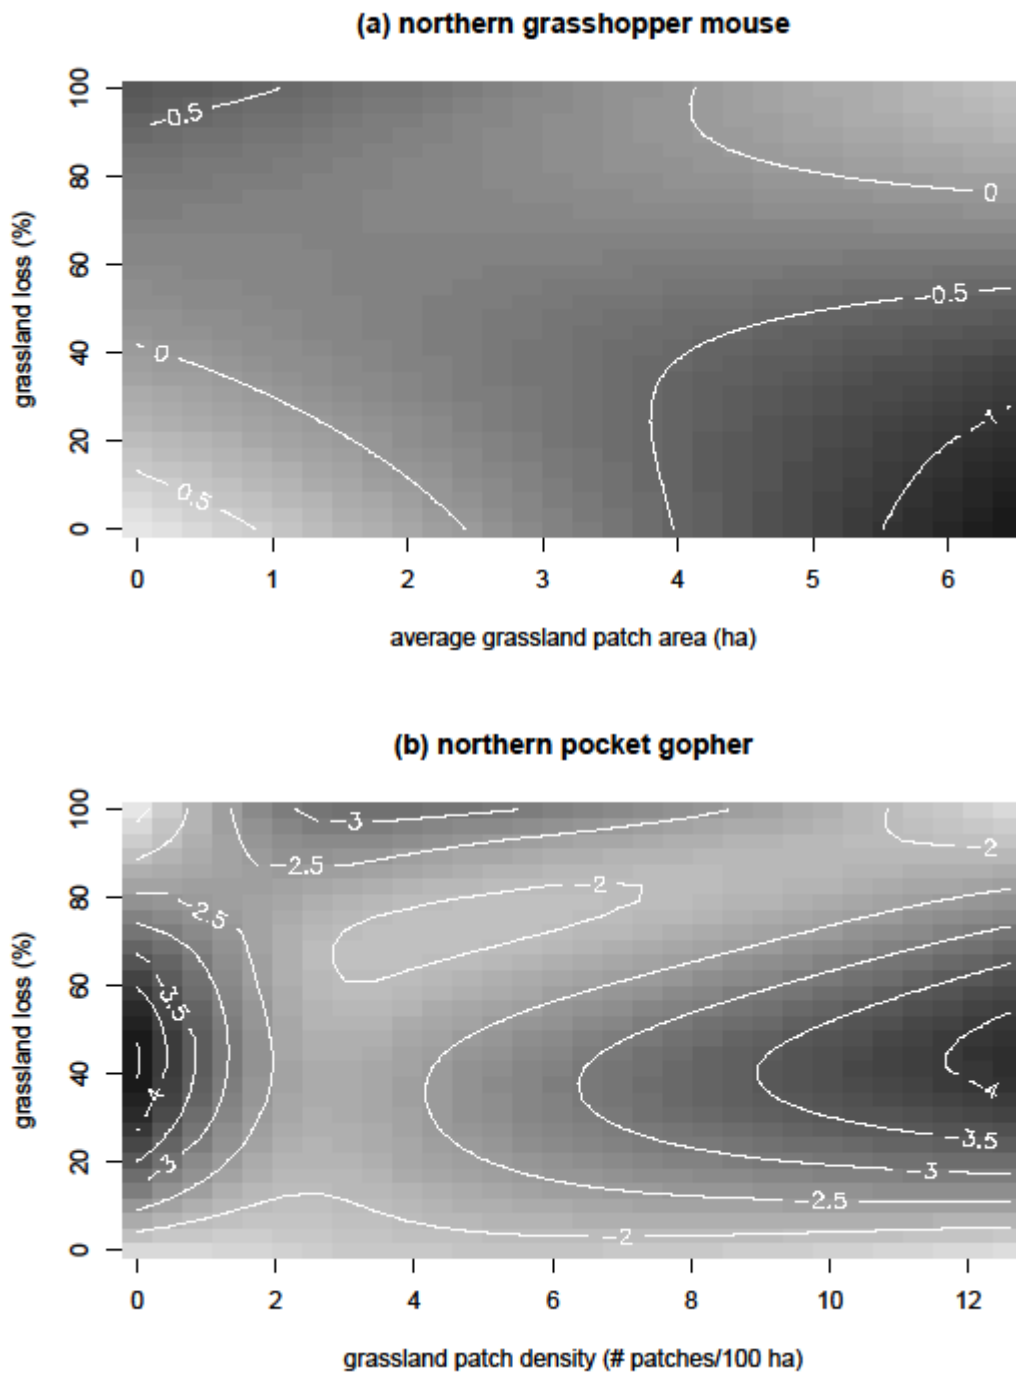

Figure 4.

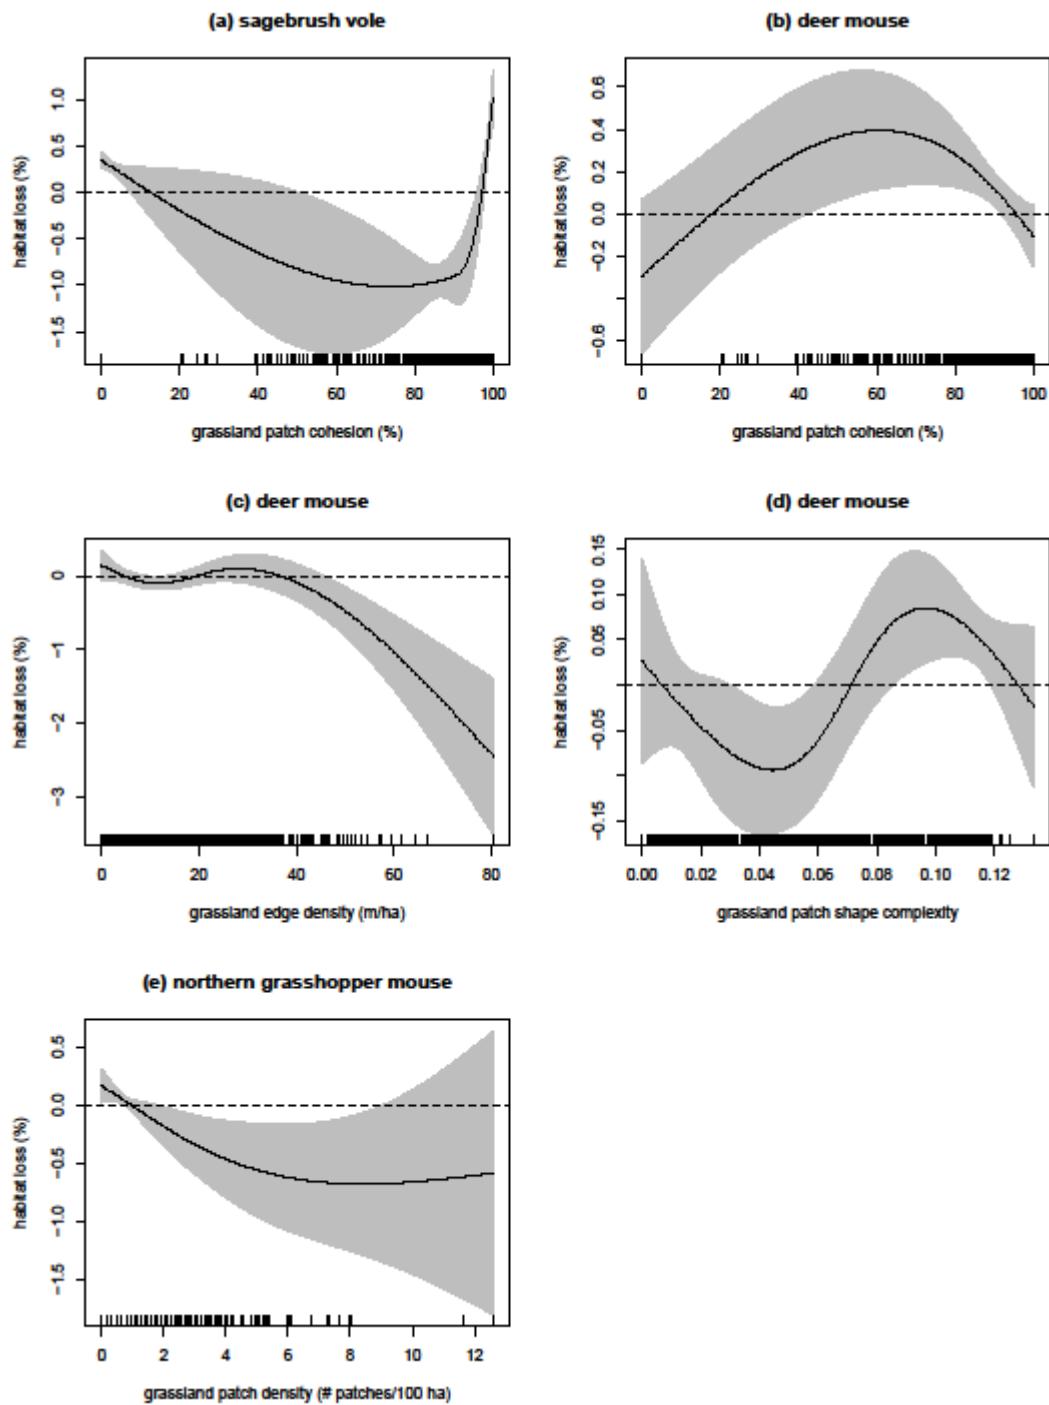

Figure 5.

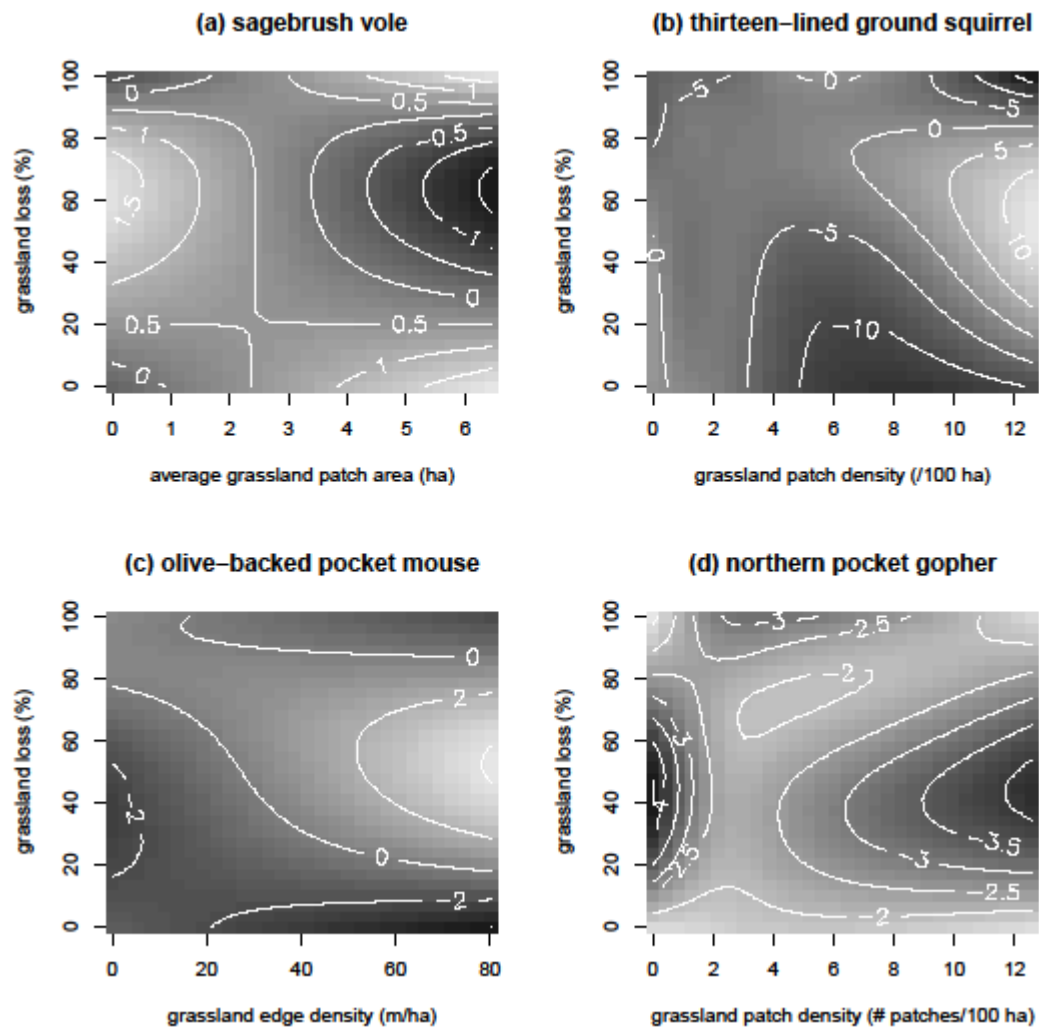

Figure 6.

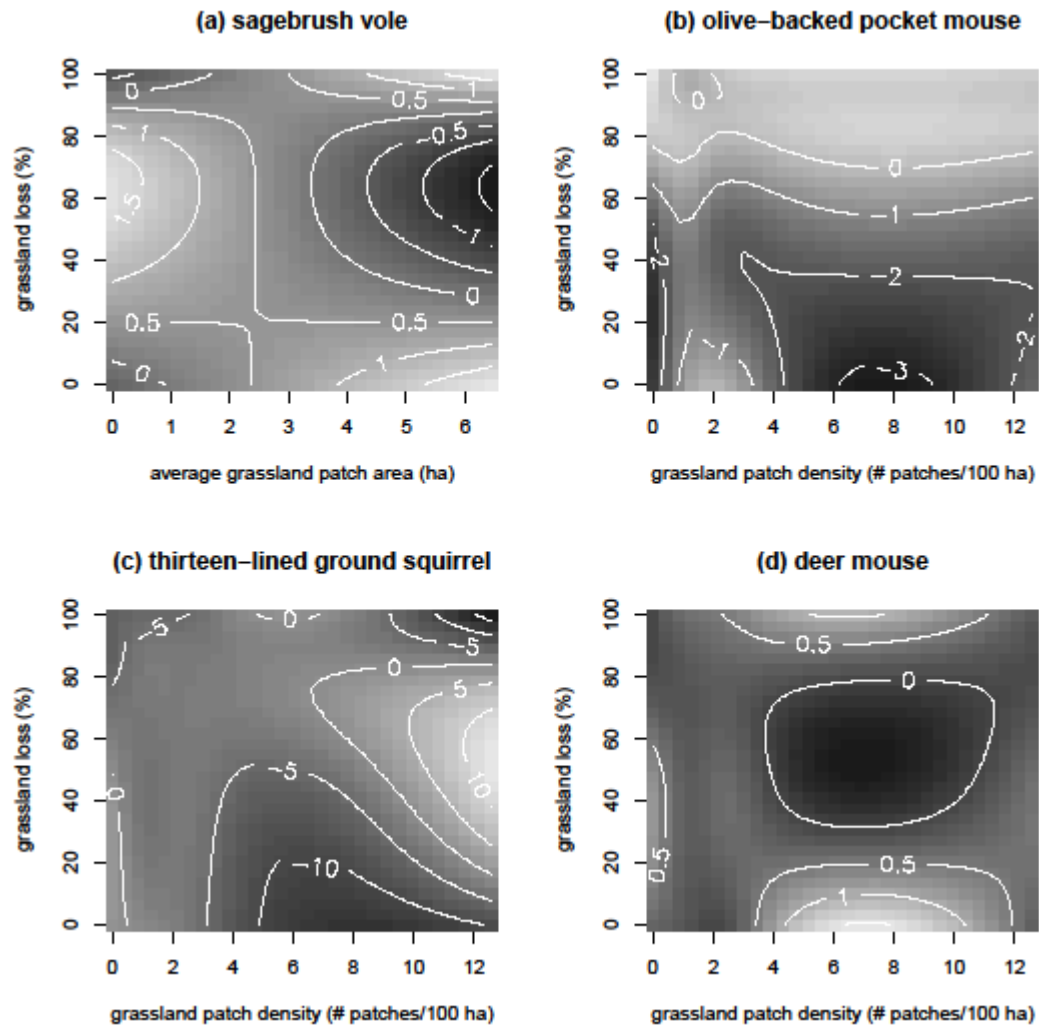

Figure 7.
